# Supplementary material for: Fast estimation of genetic correlation for biobank-scale data
Source: PubMed Central journal article supplement (PMC8764132; doi:10.1016/j.ajhg.2021.11.015), 2021-12-02
Supplement: mmc1.pdf [file mmc1.pdf]

**The American Journal of Human Genetics, Volume 109**

**Supplemental information**

**Fast estimation of genetic  
correlation for biobank-scale data**

**Yue Wu, Kathryn S. Burch, Andrea Ganna, Päivi Pajukanta, Bogdan Pasaniuc, and Sriram Sankararaman**

## Supplemental Figures and legends

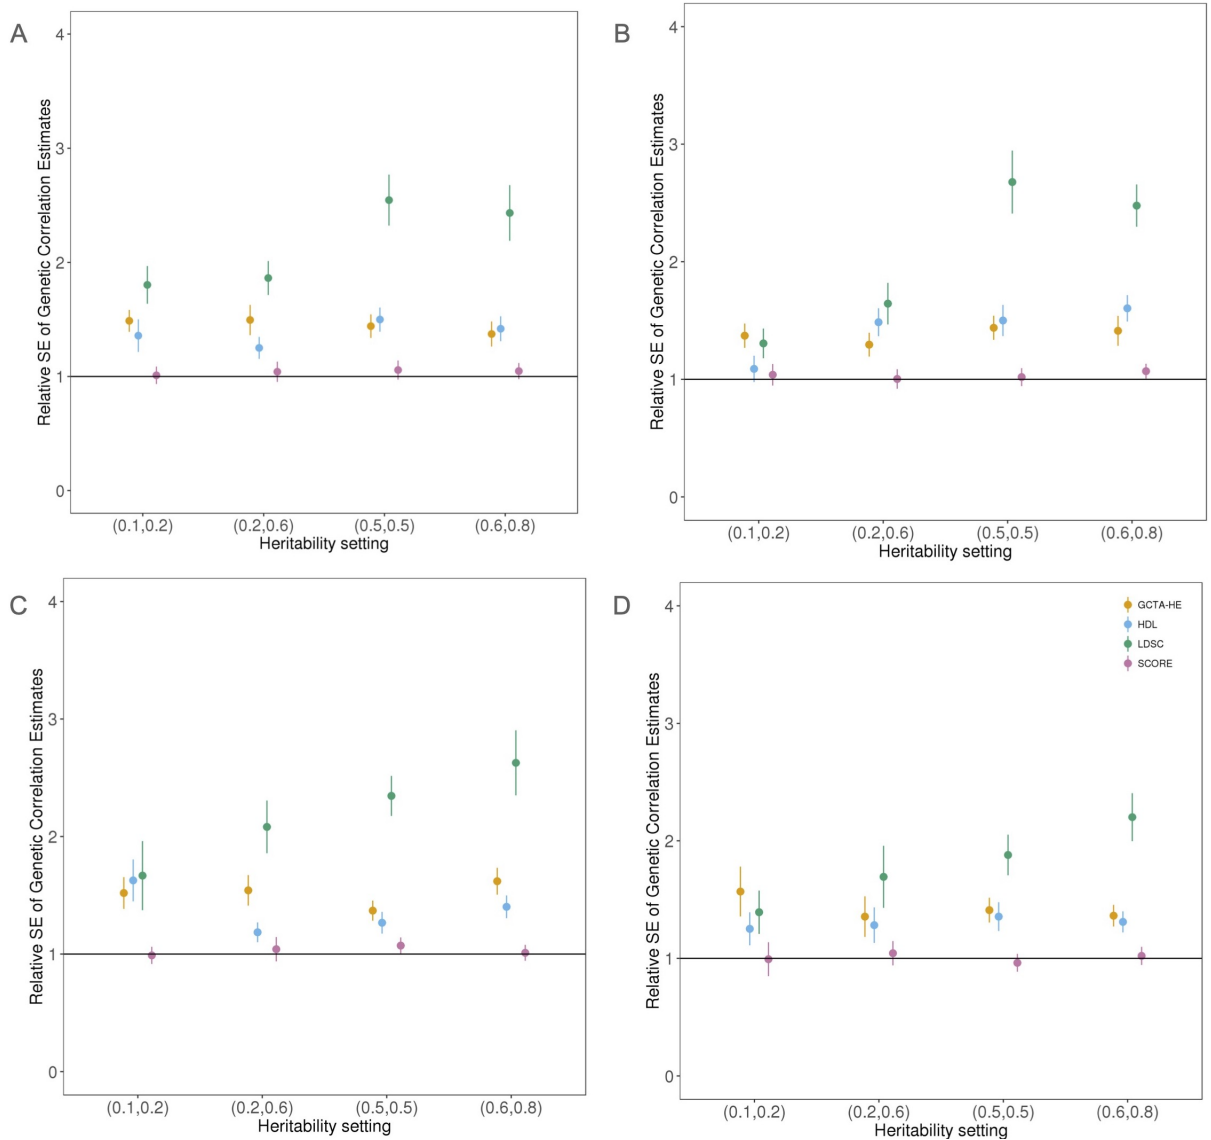

Figure S1: **Comparison of the estimates of genetic correlation from SCORE with GCTA-GREML, GCTA-HE, LDSC, and HDL in small-scale simulations ( $N = 5,000$  unrelated individuals,  $M = 305,630$  SNPs) under infinitesimal genetic architectures.** We simulated pairs of phenotypes under 16 different infinitesimal genetic architectures. Panel A, B, C, D correspond to a different value of the genetic correlation chosen from the set:  $\{0, 0.2, 0.5, 0.8\}$ . Within each panel, we varied the SNP heritability for the pair of traits across  $\{(0.1, 0.2), (0.2, 0.6), (0.5, 0.5), (0.6, 0.8)\}$  (see Simulations to assess accuracy section of Materials and Methods). We plot the standard error (SE) of each method relative to GCTA-GREML. We estimate the standard error of the relative SE using Jackknife (error bars denote 1 standard error).

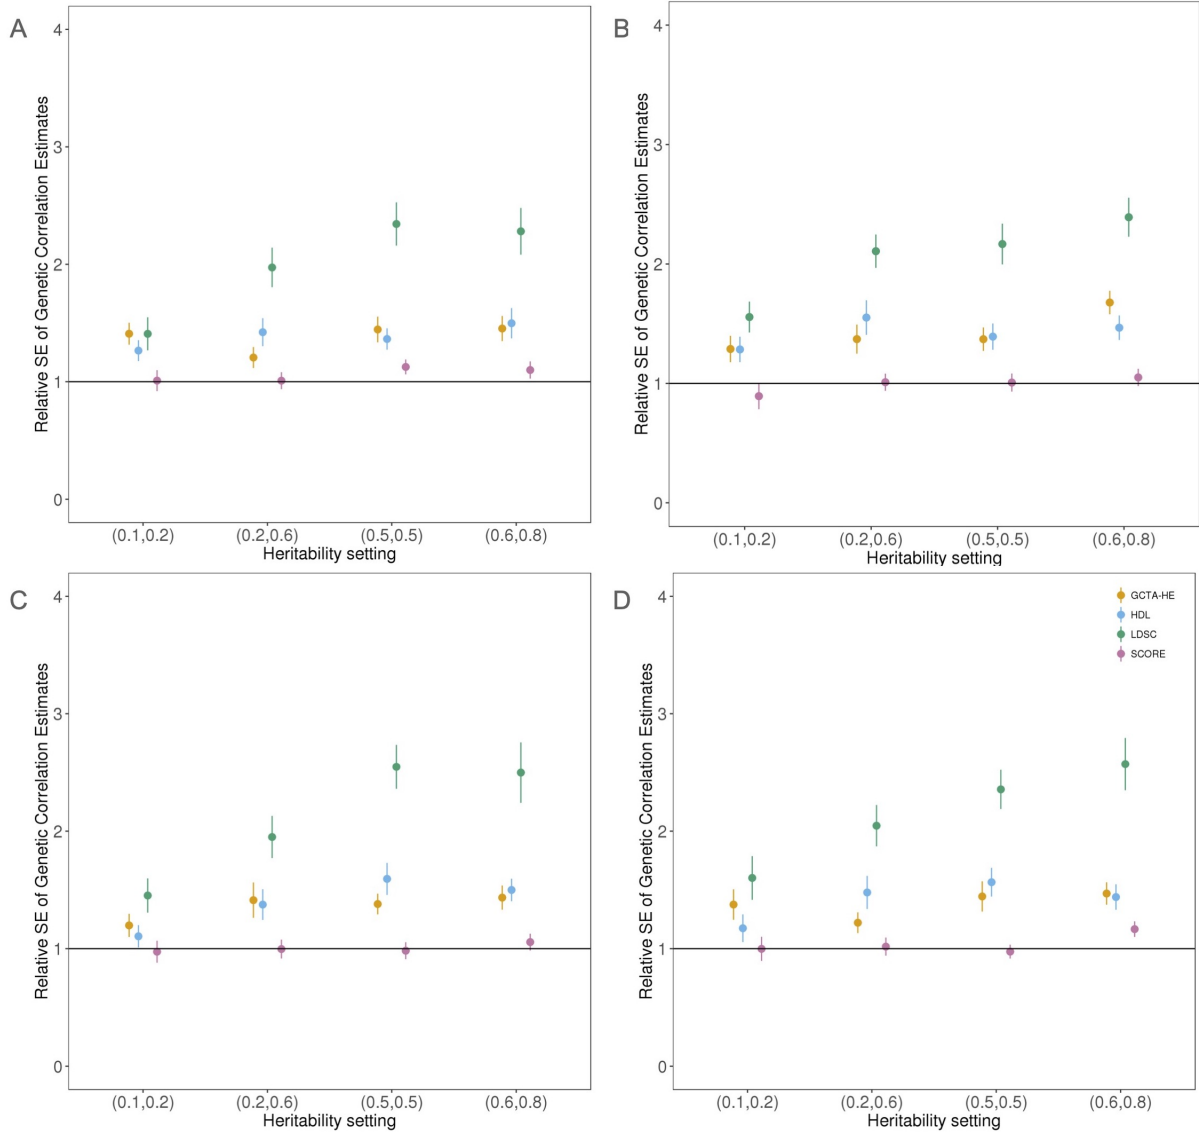

Figure S2: **Comparison of the estimates of genetic correlation from SCORE with GCTA-GREML, GCTA-HE, LDSC, and HDL in small-scale simulations ( $N = 5,000$  unrelated individuals,  $M = 305,630$  SNPs) under non-infinitesimal architectures with medium polygenicity.** We simulated pairs of phenotypes under 16 different non-infinitesimal genetic architectures. The probability of a variant being causal for both traits is 0.20, and the probability of a variant being causal for exactly one of the trait is 0.10. Panels (A, B, C, D) correspond to a different value of the genetic correlation at SNPs causal for both traits:  $\{0, 0.2, 0.5, 0.8\}$ . The causal variants are distributed uniformly across the genome. Within each panel, we varied the per-SNP heritability of variants causal for both traits to be proportional to  $\{(0.1, 0.2), (0.2, 0.6), (0.5, 0.5), (0.6, 0.8)\}$  (see Simulations to assess accuracy section of Materials and Methods). We plot the SE of each method relative to GCTA-GREML. We ran LDSC with in-sample LD and HDL with eigenvectors that preserve 90% variance. We estimate the standard error of the relative SE using Jackknife (error bars denote 1 standard error).

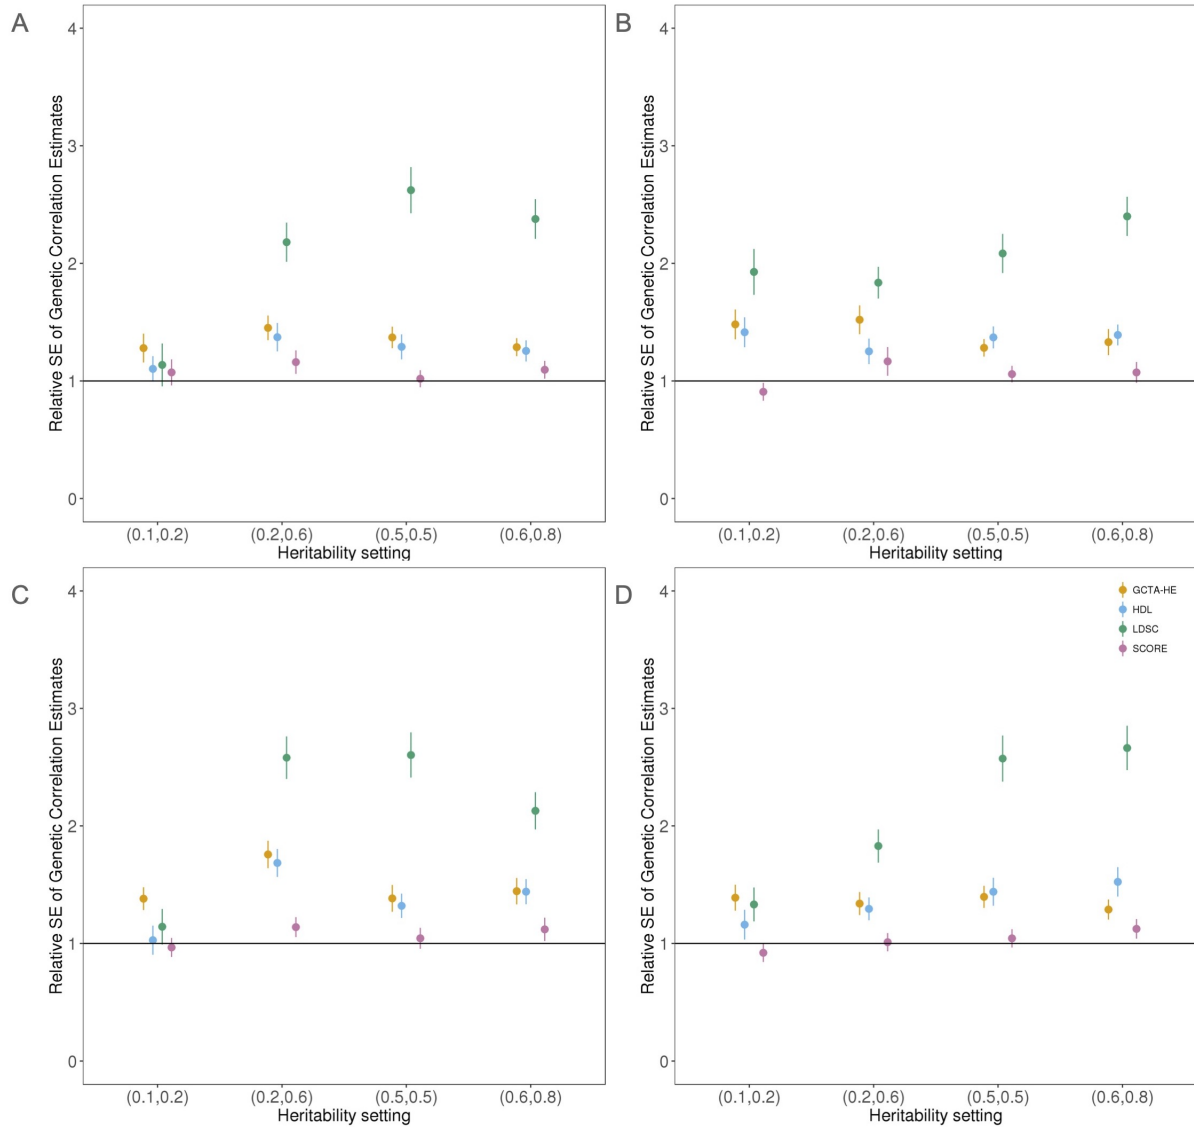

Figure S3: **Comparison of the estimates of genetic correlation from SCORE with GCTA-GREML, GCTA-HE, LDSC, and HDL in small-scale simulations ( $N = 5,000$  unrelated individuals,  $M = 305,630$  SNPs) under non-infinitesimal architectures with low polygenicity.** We simulated pairs of phenotypes under 16 different non-infinitesimal genetic architectures. The probability of a variant being causal for both traits is 0.01, and the probability of a variant being causal for exactly one of the trait is 0.05. Panels (A, B, C, D) correspond to a different value of the genetic correlation at SNPs causal for both traits:  $\{0, 0.2, 0.5, 0.8\}$ . The causal variants are distributed uniformly across the genome. Within each panel, we varied the per-SNP heritability of variants causal for both traits to be proportional to  $\{(0.1, 0.2), (0.2, 0.6), (0.5, 0.5), (0.6, 0.8)\}$  (see Simulations to assess accuracy section of Materials and Methods). We plot the SE of each method relative to GCTA-GREML. We ran LDSC with in-sample LD and HDL with eigenvectors that preserve 90% variance. We estimate the standard error of the relative SE using Jackknife (error bars denote 1 standard error).

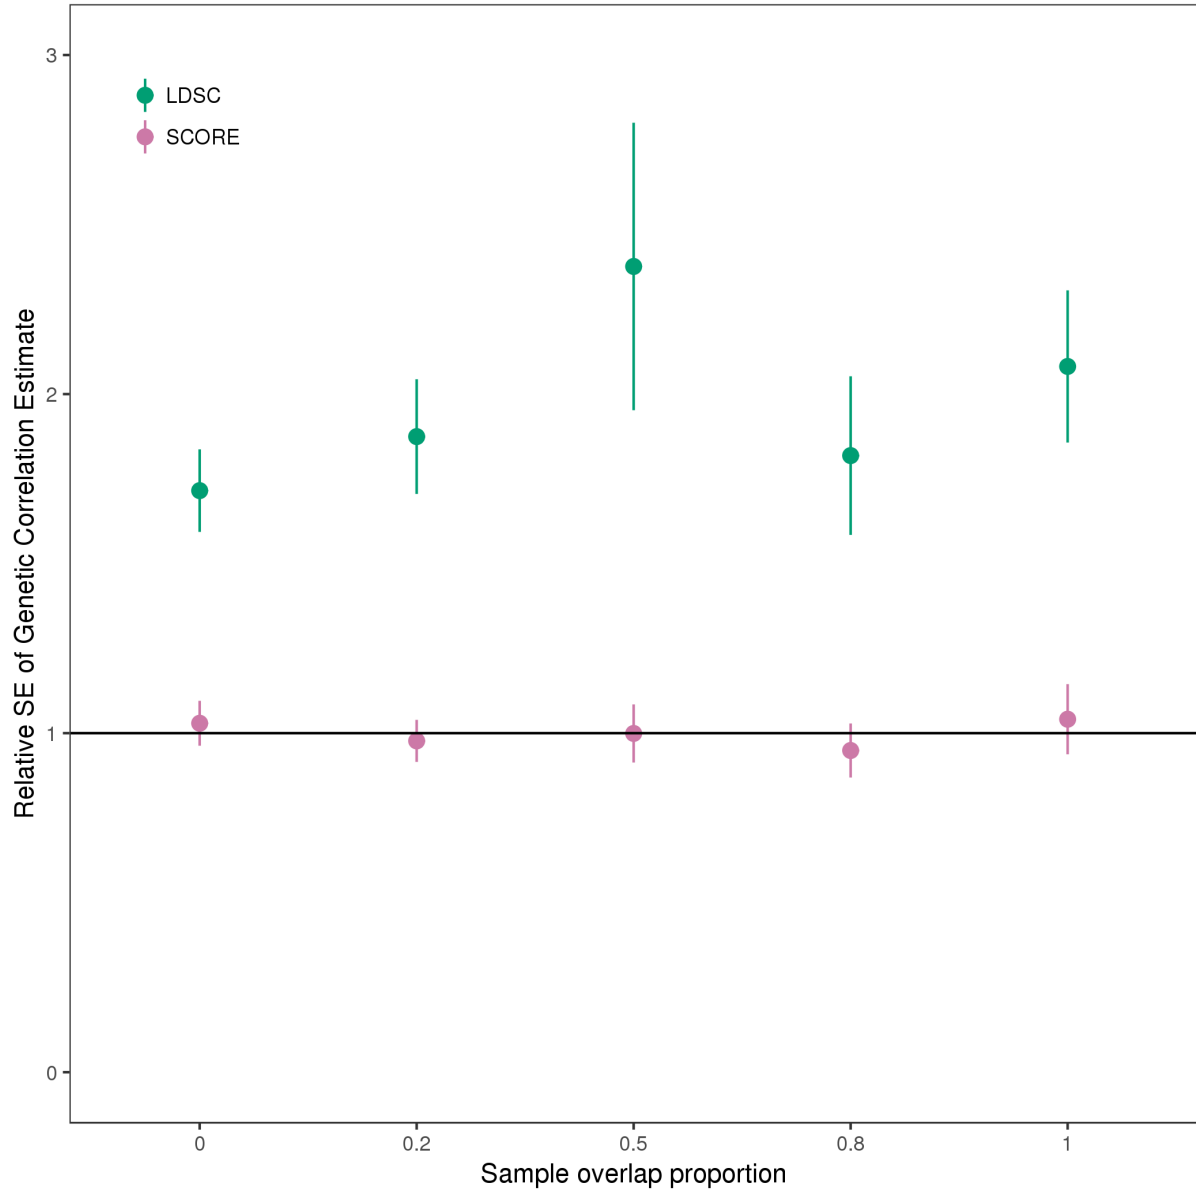

Figure S4: **Comparison of the estimates of genetic correlation from SCORE with GCTA-GREML and LDSC as a function of sample overlap ( $M = 305,630$  SNPs).** We vary the proportion of sample overlap across  $\{0, 0.2, 0.5, 0.8, 1\}$ . For sample overlap proportion of 0, we have a total of 10,000 samples where each sample only has observation on one of the traits. For overlap proportion of 1, we have a total 5,000 samples with each sample having observations on both traits (see Simulations to assess the impact of sample overlap in Materials and Methods). We report the SE of SCORE and LDSC relative to GCTA-GREML. We ran LDSC with in-sample LD. We estimate the standard error of the relative SE using jackknife.

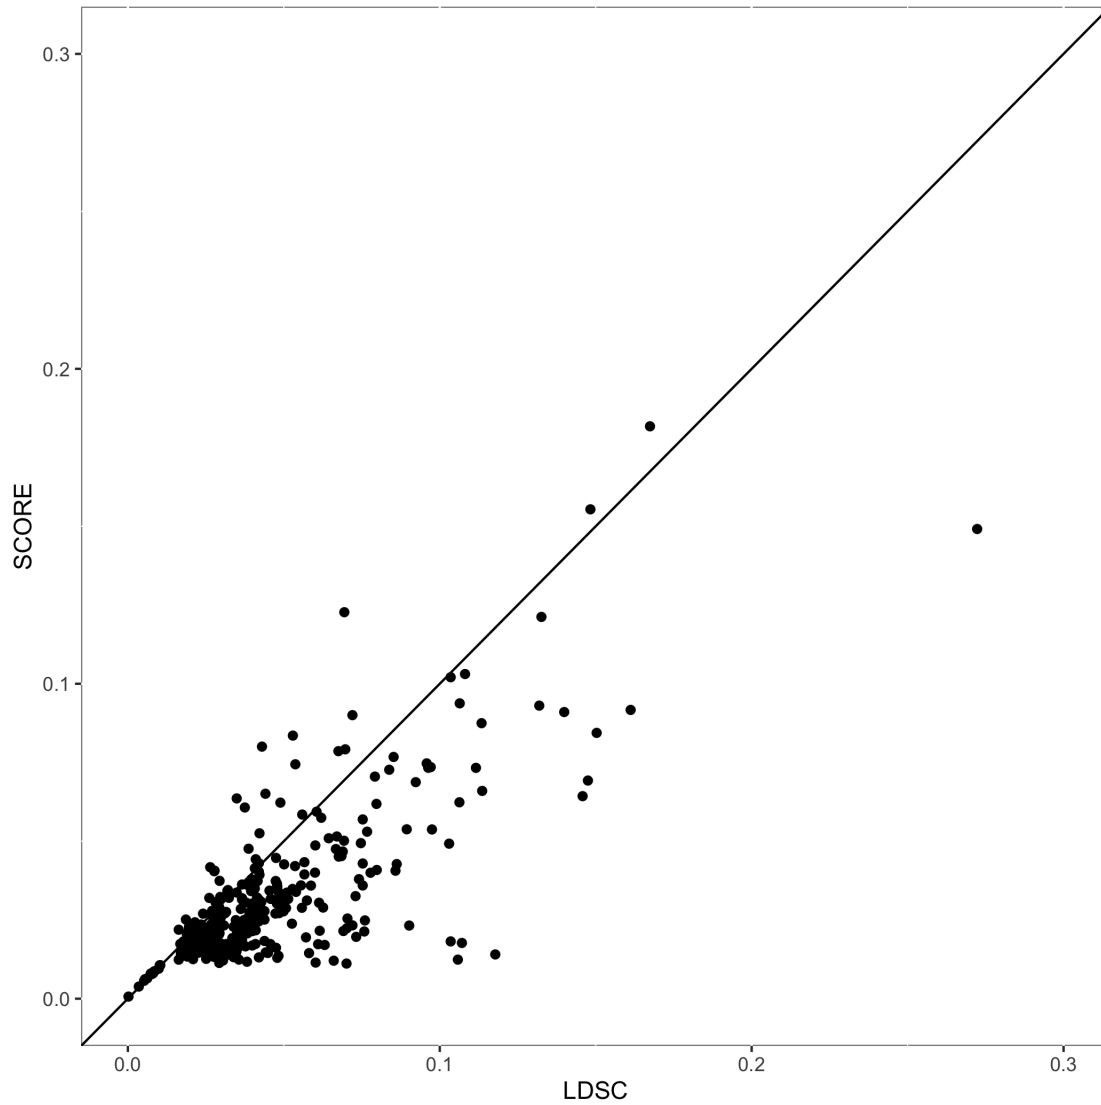

Figure S5: **Standard error estimates of genetic correlation between 28 UK biobank phenotypes with LDSC and SCORE corresponding to Figure 3.** Each dot denotes the standard error estimates of SCORE and LDSC for a pair of traits.

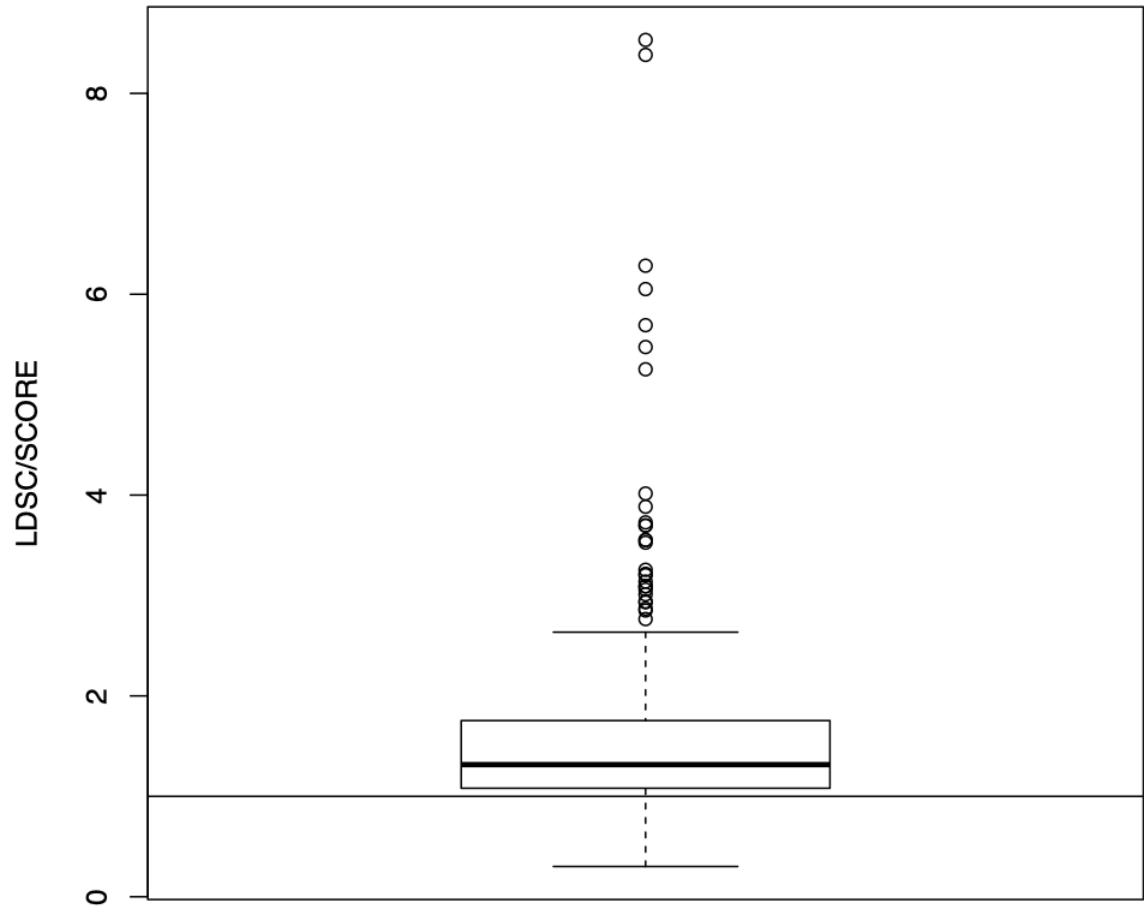

Figure S6: **Ratio of standard error estimates of genetic correlation between 28 UK biobank phenotypes with LDSC and SCORE corresponding to Figure 3.** On average, the standard error estimate of LDSC is about 1.57 times that of SCORE.

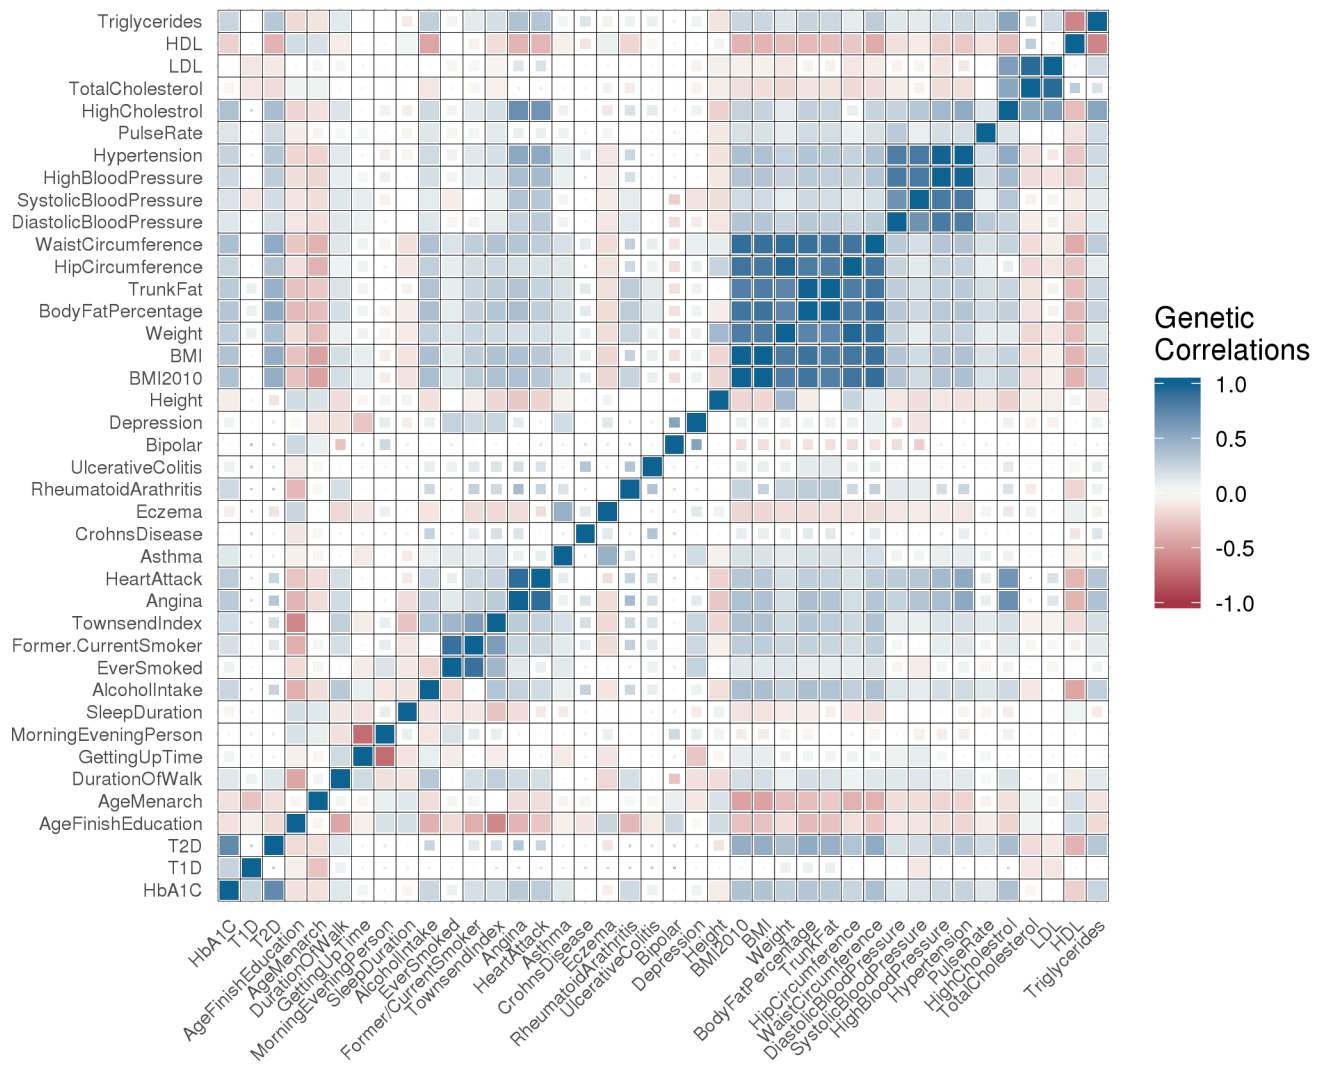

Figure S7: **Genetic correlation estimates in the UK Biobank on array SNPs:** We plot the genetic correlation estimates from SCORE across pairs of 40 phenotypes. The full list of traits and category is in Supplementary Table (Table S10). Large squares correspond to pairs that are estimated to have a statistically significant genetic correlation after Bonferroni correction at a 5% significance level while small squares indicate pairs that are significant at a 5% significance level but do not pass multiple-testing correction (see section on Quality control of UK Biobank data in Materials and Methods).



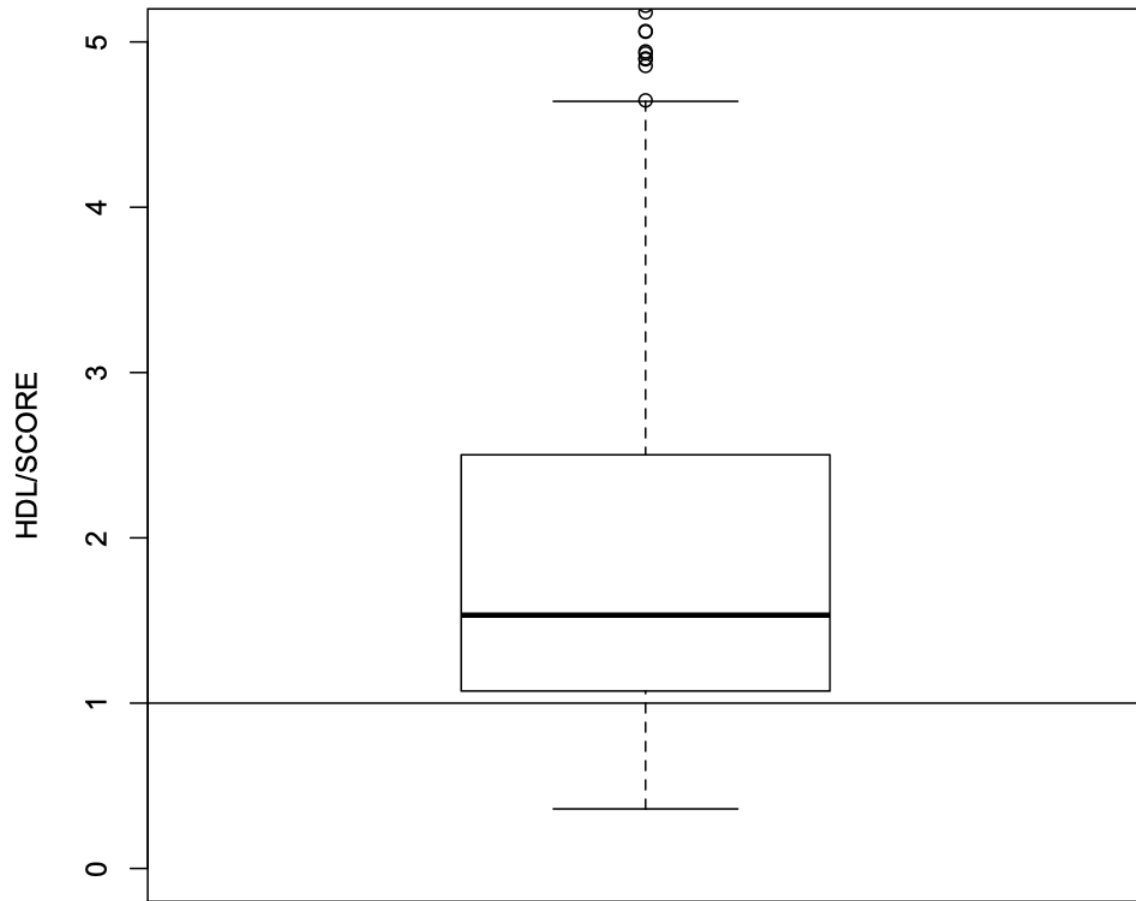

Figure S8: **Ratio of standard error estimates of genetic correlation between 40 UK biobank phenotypes with HDL and SCORE corresponding to Table S10.** The standard error estimate of HDL is about 2.53 times that of SCORE on average (median of ratio is about 1.53).

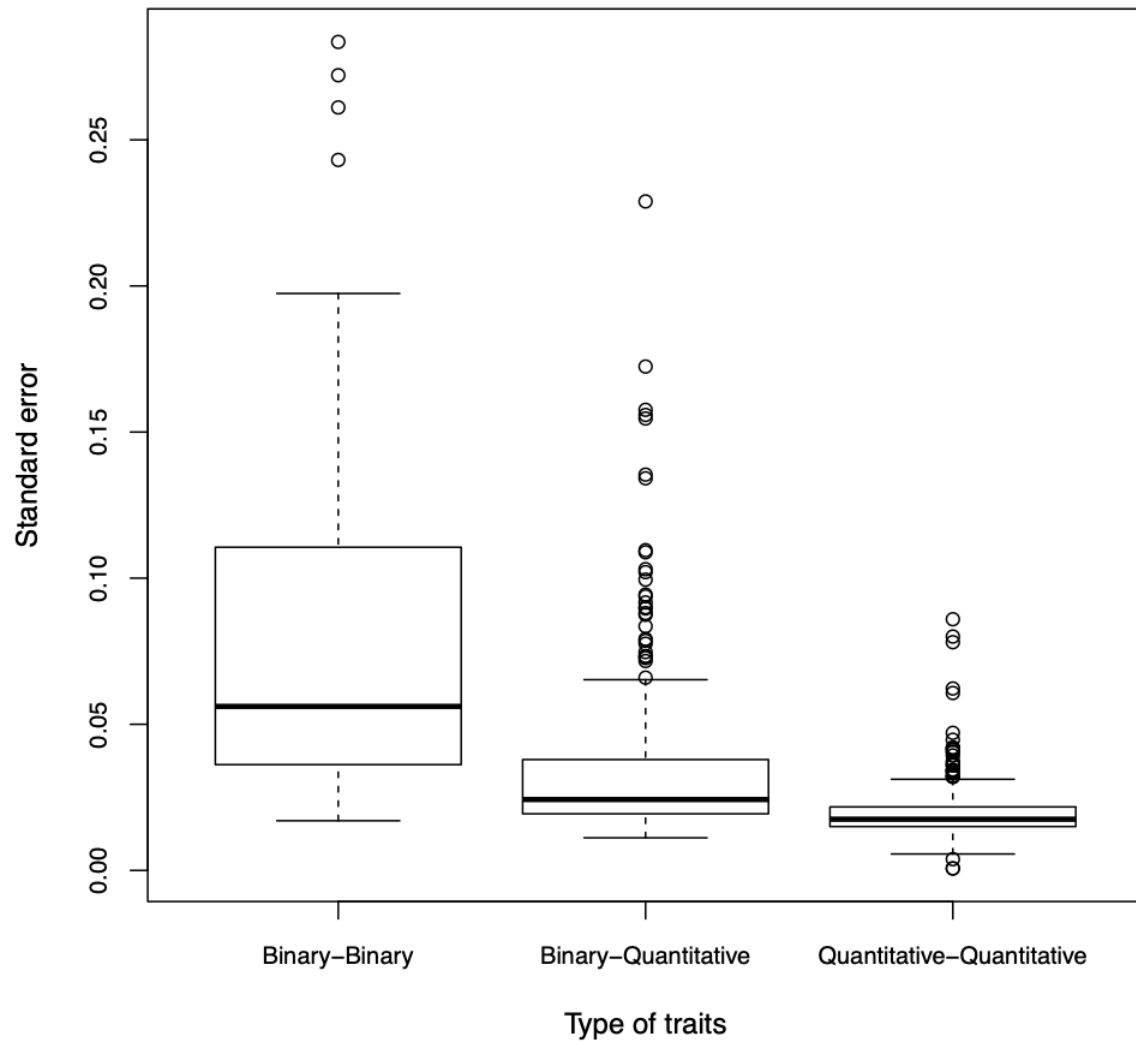

Figure S9: Standard error of genetic correlation estimates from SCORE stratified by the type of phenotype pairs.

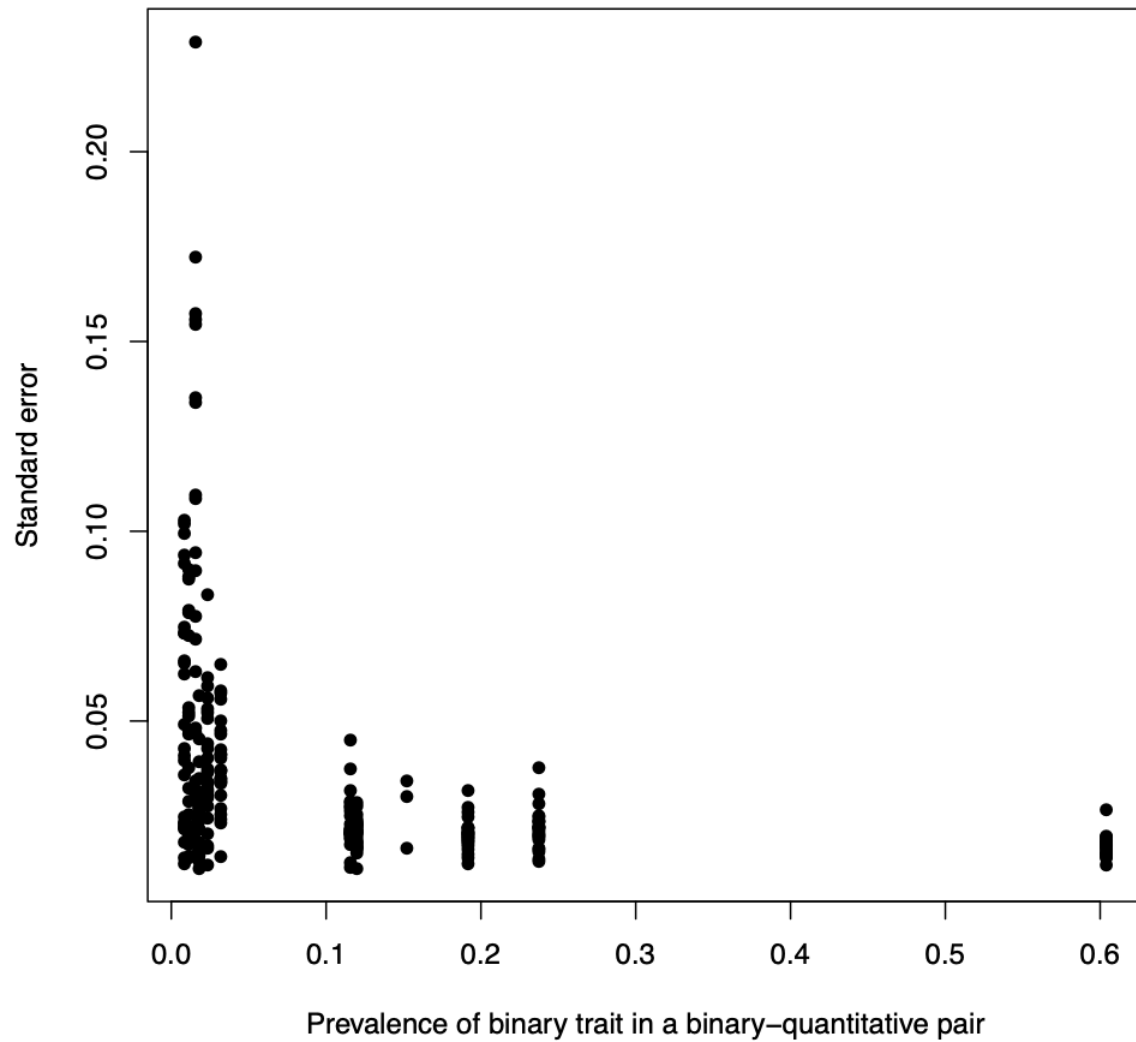

Figure S10: Standard error of genetic correlation estimates from SCORE as a function of the prevalence of the binary phenotype when applied to a pair of phenotypes where one of traits in the pair is binary.

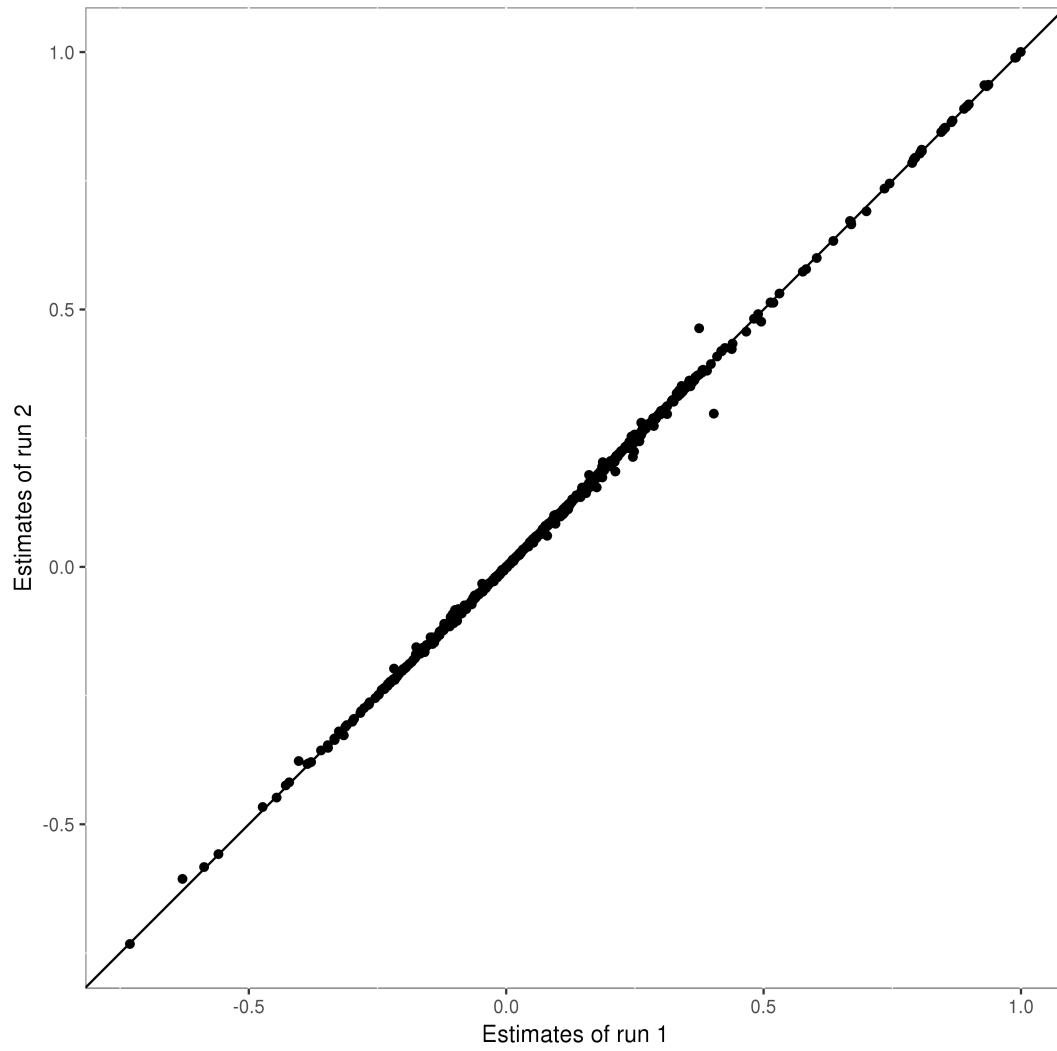

Figure S11: **Estimates of genetic correlation in the UK Biobank with different random vectors.** We plot the point estimates of genetic correlation across all pairs of 40 traits in Table S10 using SCORE with different sets of random vectors.

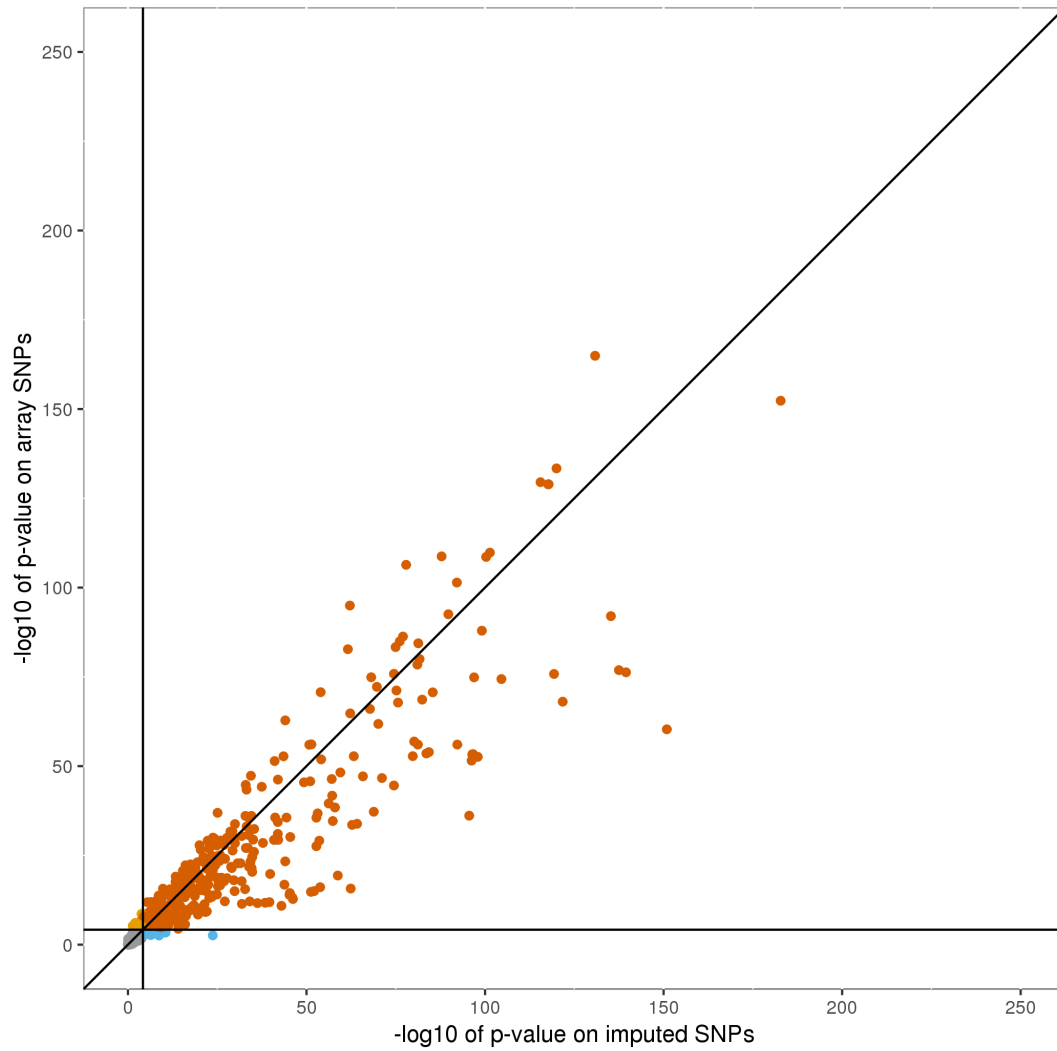

Figure S12: **Comparison of the p-values of  $\rho_g$  estimates obtained by SCORE in the UK Biobank on imputed versus array SNPs.** We analyze all pairs of 40 traits in Table S10 with SCORE on both array and imputed SNPs. We plot the  $-\log_{10}$  of the p-values of a test of null hypothesis of zero genetic correlation using the two sets of SNPs. The vertical and horizontal solid lines denote the threshold of significance after Bonferroni correction, which is  $-\log_{10}(0.05/780)$ . We found 19 pairs of significant genetic correlation unique to imputed SNPs (light orange), and 22 pairs unique to array SNPs (light blue). There are 423 pairs found significant on both sets of SNPs (dark orange) (see section on Quality control of UK Biobank data in Materials and Methods).

# Supplemental Tables

| Polygenicity        | Method<br>SCORE | Genetic correlation $\rho_g$ | Bias<br>$h_1^2 = 0.1, h_2^2 = 0.2$ | MSE    | SE     | Bias<br>$h_1^2 = 0.2, h_2^2 = 0.6$ | MSE    | SE     | Bias<br>$h_1^2 = 0.5, h_2^2 = 0.5$ | MSE    | SE     | Bias<br>$h_1^2 = 0.6, h_2^2 = 0.8$ | MSE    | SE     |
|---------------------|-----------------|------------------------------|------------------------------------|--------|--------|------------------------------------|--------|--------|------------------------------------|--------|--------|------------------------------------|--------|--------|
| Infinitesimal       | OVERLAP         | 0                            | -0.0826                            | 0.1019 | 0.3083 | -0.0302                            | 0.0428 | 0.2048 | 0.0099                             | 0.0145 | 0.1201 | 0.0083                             | 0.0084 | 0.0912 |
|                     | B=10            | 0                            | -0.0826                            | 0.1018 | 0.3082 | -0.0301                            | 0.0428 | 0.2047 | 0.0099                             | 0.0145 | 0.1201 | 0.0083                             | 0.0084 | 0.0912 |
|                     | B=100           | 0                            | -0.0826                            | 0.1018 | 0.3082 | -0.0301                            | 0.0428 | 0.2047 | 0.0099                             | 0.0145 | 0.1201 | 0.0083                             | 0.0084 | 0.0912 |
|                     | OVERLAP         | 0.2                          | -0.05                              | 0.132  | 0.3598 | -0.01                              | 0.033  | 0.1814 | 0.0147                             | 0.0159 | 0.1253 | -0.0173                            | 0.0089 | 0.0928 |
|                     | B=10            | 0.2                          | -0.05                              | 0.1319 | 0.3597 | -0.01                              | 0.033  | 0.1813 | 0.0147                             | 0.0159 | 0.1253 | -0.0173                            | 0.0089 | 0.0928 |
|                     | B=100           | 0.2                          | -0.05                              | 0.1319 | 0.3597 | -0.01                              | 0.033  | 0.1813 | 0.0147                             | 0.0159 | 0.1253 | -0.0173                            | 0.0089 | 0.0928 |
|                     | OVERLAP         | 0.5                          | -0.1567                            | 0.0841 | 0.244  | -0.016                             | 0.0266 | 0.1622 | 0.0115                             | 0.0137 | 0.1164 | 0.0143                             | 0.0047 | 0.0669 |
|                     | B=10            | 0.5                          | -0.1568                            | 0.0841 | 0.244  | -0.0161                            | 0.0266 | 0.1621 | 0.0114                             | 0.0137 | 0.1164 | 0.0142                             | 0.0047 | 0.0669 |
|                     | B=100           | 0.5                          | -0.1568                            | 0.0841 | 0.244  | -0.0161                            | 0.0266 | 0.1621 | 0.0116                             | 0.0138 | 0.1169 | 0.0142                             | 0.0047 | 0.0669 |
|                     | OVERLAP         | 0.8                          | -0.3187                            | 0.156  | 0.2334 | -0.1106                            | 0.0309 | 0.1365 | -0.0206                            | 0.0067 | 0.0789 | -0.0016                            | 0.0034 | 0.0583 |
|                     | B=10            | 0.8                          | -0.3187                            | 0.156  | 0.2333 | -0.1107                            | 0.0309 | 0.1365 | -0.0207                            | 0.0067 | 0.0789 | -0.0017                            | 0.0034 | 0.0583 |
|                     | B=100           | 0.8                          | -0.3187                            | 0.156  | 0.2333 | -0.1107                            | 0.0309 | 0.1365 | -0.0207                            | 0.0067 | 0.0789 | -0.0017                            | 0.0034 | 0.0583 |
| Medium polygenicity | OVERLAP         | 0                            | 0.0506                             | 0.1227 | 0.3466 | 0.0023                             | 0.0349 | 0.1869 | 0.0022                             | 0.0198 | 0.1408 | 0.0052                             | 0.0091 | 0.0952 |
|                     | B=10            | 0                            | 0.0506                             | 0.1226 | 0.3465 | 0.0023                             | 0.0349 | 0.1868 | 0.0022                             | 0.0198 | 0.1408 | 0.0052                             | 0.0091 | 0.0952 |
|                     | B=100           | 0                            | 0.0506                             | 0.1226 | 0.3465 | 0.0023                             | 0.0349 | 0.1868 | 0.0022                             | 0.0198 | 0.1408 | 0.0052                             | 0.0091 | 0.0952 |
|                     | OVERLAP         | 0.2                          | 0.0259                             | 0.0965 | 0.3096 | 0.0116                             | 0.0382 | 0.1952 | -6e-04                             | 0.0161 | 0.1267 | -0.01                              | 0.0065 | 0.0797 |
|                     | B=10            | 0.2                          | 0.0259                             | 0.0965 | 0.3096 | 0.0115                             | 0.0382 | 0.1952 | -7e-04                             | 0.0161 | 0.1267 | -0.01                              | 0.0065 | 0.0797 |
|                     | B=100           | 0.2                          | 0.0259                             | 0.0965 | 0.3096 | 0.0115                             | 0.0382 | 0.1952 | -7e-04                             | 0.0161 | 0.1267 | -0.01                              | 0.0065 | 0.0797 |
|                     | OVERLAP         | 0.5                          | 0.0317                             | 0.0974 | 0.3104 | 0.0039                             | 0.0287 | 0.1693 | 0.0197                             | 0.0118 | 0.1066 | 0.0076                             | 0.0083 | 0.0909 |
|                     | B=10            | 0.5                          | 0.0316                             | 0.0973 | 0.3104 | 0.0039                             | 0.0287 | 0.1693 | 0.0197                             | 0.0117 | 0.1066 | 0.0076                             | 0.0083 | 0.0909 |
|                     | B=100           | 0.5                          | 0.0316                             | 0.0973 | 0.3104 | 0.0039                             | 0.0287 | 0.1693 | 0.022                              | 0.0114 | 0.1045 | 0.0076                             | 0.0083 | 0.0909 |
|                     | OVERLAP         | 0.8                          | -0.1181                            | 0.1209 | 0.3271 | 0.0116                             | 0.031  | 0.1758 | 0.0228                             | 0.013  | 0.1119 | 0.031                              | 0.0121 | 0.1054 |
|                     | B=10            | 0.8                          | -0.1182                            | 0.1209 | 0.327  | 0.0115                             | 0.031  | 0.1758 | 0.0228                             | 0.013  | 0.1118 | 0.0309                             | 0.0121 | 0.1054 |
|                     | B=100           | 0.8                          | -0.1182                            | 0.1209 | 0.327  | 0.0115                             | 0.031  | 0.1758 | 0.0228                             | 0.013  | 0.1118 | 0.0309                             | 0.0121 | 0.1054 |
| Low polygenicity    | OVERLAP         | 0                            | 0.0694                             | 0.136  | 0.3623 | 0.0115                             | 0.0452 | 0.2123 | -0.0223                            | 0.0158 | 0.1236 | -0.0091                            | 0.0101 | 0.0999 |
|                     | B=10            | 0                            | 0.0694                             | 0.136  | 0.3622 | 0.0115                             | 0.0452 | 0.2123 | -0.0223                            | 0.0158 | 0.1236 | -0.0091                            | 0.0101 | 0.0999 |
|                     | B=100           | 0                            | 0.0694                             | 0.136  | 0.3622 | 0.0115                             | 0.0452 | 0.2123 | -0.0223                            | 0.0158 | 0.1236 | -0.0091                            | 0.0101 | 0.0999 |
|                     | OVERLAP         | 0.2                          | 0.0135                             | 0.0594 | 0.2433 | 0.0366                             | 0.0424 | 0.2025 | 0.018                              | 0.0188 | 0.136  | 0.0193                             | 0.0105 | 0.1004 |
|                     | B=10            | 0.2                          | 0.0135                             | 0.0594 | 0.2433 | 0.0366                             | 0.0424 | 0.2025 | 0.018                              | 0.0188 | 0.136  | 0.0193                             | 0.0105 | 0.1004 |
|                     | B=100           | 0.2                          | 0.0135                             | 0.0594 | 0.2433 | 0.0366                             | 0.0424 | 0.2025 | 0.018                              | 0.0188 | 0.136  | 0.0193                             | 0.0105 | 0.1004 |
|                     | OVERLAP         | 0.5                          | 0.0463                             | 0.0992 | 0.3116 | 0.0478                             | 0.0261 | 0.1544 | 0.0882                             | 0.0215 | 0.1171 | 0.0334                             | 0.0121 | 0.1048 |
|                     | B=10            | 0.5                          | 0.0463                             | 0.0992 | 0.3116 | 0.0478                             | 0.0261 | 0.1544 | 0.0882                             | 0.0215 | 0.1171 | 0.0334                             | 0.0121 | 0.1048 |
|                     | B=100           | 0.5                          | 0.0463                             | 0.0992 | 0.3116 | 0.0478                             | 0.0261 | 0.1544 | 0.0882                             | 0.0215 | 0.1171 | 0.0334                             | 0.0121 | 0.1048 |
|                     | OVERLAP         | 0.8                          | 0.0363                             | 0.083  | 0.2857 | 0.0953                             | 0.042  | 0.1815 | 0.0839                             | 0.0253 | 0.1353 | 0.0869                             | 0.0175 | 0.0998 |
|                     | B=10            | 0.8                          | 0.0363                             | 0.083  | 0.2857 | 0.0953                             | 0.042  | 0.1815 | 0.0839                             | 0.0253 | 0.1353 | 0.0869                             | 0.0175 | 0.0998 |
|                     | B=100           | 0.8                          | 0.0363                             | 0.083  | 0.2857 | 0.0953                             | 0.042  | 0.1815 | 0.0839                             | 0.0253 | 0.1353 | 0.0869                             | 0.0175 | 0.0998 |

Table S1: **Estimates of bias, mean square error and standard error of SCORE for varying number of random vectors  $B = 10, B = 100$  and SCORE-OVERLAP.** See section on Simulations to assess accuracy in Materials and Methods for details.

| Polygenicity     | Method              | Genetic correlation $\rho_g$ | $(h_1^2, h_2^2)$ |            |            |            |      |
|------------------|---------------------|------------------------------|------------------|------------|------------|------------|------|
|                  |                     |                              | (0.1, 0.2)       | (0.2, 0.6) | (0.5, 0.5) | (0.6, 0.8) |      |
| Infinitesimal    | LDSC/SCORE          | 0                            | 1.79             | 1.79       | 2.41       | 2.32       |      |
|                  | HDL/SCORE           | 0                            | 1.35             | 1.2        | 1.42       | 1.35       |      |
|                  | LDSC/SCORE          | 0.2                          | 1.26             | 1.64       | 2.63       | 2.32       |      |
|                  | HDL /SCORE          | 0.2                          | 1.05             | 1.48       | 1.47       | 1.5        |      |
|                  | LDSC/SCORE          | 0.5                          | 1.69             | 2          | 2.19       | 2.6        |      |
|                  | HDL/SCORE           | 0.5                          | 1.65             | 1.14       | 1.18       | 1.39       |      |
|                  | LDSC/SCORE          | 0.8                          | 1.4              | 1.62       | 1.95       | 2.16       |      |
|                  | HDL/SCORE           | 0.8                          | 1.26             | 1.23       | 1.41       | 1.28       |      |
|                  | Medium polygenicity | LDSC/SCORE                   | 0                | 1.4        | 1.96       | 2.08       | 2.07 |
|                  |                     | HDL/SCORE                    | 0                | 1.25       | 1.41       | 1.21       | 1.36 |
| LDSC/SCORE       |                     | 0.2                          | 1.74             | 2.09       | 2.15       | 2.28       |      |
| HDL/SCORE        |                     | 0.2                          | 1.44             | 1.54       | 1.38       | 1.4        |      |
| LDSC/SCORE       |                     | 0.5                          | 1.49             | 1.96       | 2.59       | 2.37       |      |
| HDL/SCORE        |                     | 0.5                          | 1.41             | 1.32       | 1.54       | 1.42       |      |
| LDSC/SCORE       |                     | 0.8                          | 1.6              | 2.01       | 2.42       | 2.2        |      |
| HDL/SCORE        |                     | 0.8                          | 1.17             | 1.45       | 1.61       | 1.23       |      |
| Low polygenicity | LDSC/SCORE          | 0                            | 1.08             | 1.92       | 2.57       | 2.17       |      |
|                  | HDL/SCORE           | 0                            | 1.11             | 1.18       | 1.27       | 1.15       |      |
|                  | LDSC/SCORE          | 0.2                          | 1.79             | 1.57       | 1.97       | 2.24       |      |
|                  | HDL/SCORE           | 0.2                          | 1.31             | 1.07       | 1.29       | 1.3        |      |
|                  | LDSC/SCORE          | 0.5                          | 1.18             | 2.25       | 2.49       | 1.9        |      |
|                  | HDL/SCORE           | 0.5                          | 1.08             | 1.44       | 1.26       | 1.29       |      |
|                  | LDSC/SCORE          | 0.8                          | 1.45             | 1.81       | 2.47       | 2.37       |      |
|                  | HDL/SCORE           | 0.8                          | 1.24             | 1.28       | 1.38       | 1.36       |      |

Table S2: **Ratio of SE of summary-statistic methods relative to SCORE** ( $N = 5,000$  individuals,  $M = 305,630$  SNPs). See section on Simulations to assess accuracy in Materials and Methods for details.

| Method     | Genetic correlation $\rho_g$ | $h_1^2 = 0.1, h_2^2 = 0.2$ |        |        | $h_1^2 = 0.2, h_2^2 = 0.6$ |        |        | $h_1^2 = 0.5, h_2^2 = 0.5$ |        |        | $h_1^2 = 0.6, h_2^2 = 0.8$ |        |        |
|------------|------------------------------|----------------------------|--------|--------|----------------------------|--------|--------|----------------------------|--------|--------|----------------------------|--------|--------|
|            |                              | Bias                       | MSE    | SE     | Bias                       | MSE    | SE     | Bias                       | MSE    | SE     | Bias                       | MSE    | SE     |
| GCTA-GREML | 0                            | -0.0818                    | 0.0998 | 0.305  | -0.029                     | 0.0395 | 0.197  | 0.0096                     | 0.013  | 0.114  | 0.0014                     | 0.0076 | 0.0871 |
| GCTA-HE    | 0                            | -0.104                     | 0.217  | 0.454  | 0.0366                     | 0.0878 | 0.294  | 0.0026                     | 0.0268 | 0.164  | 0.0225                     | 0.0148 | 0.119  |
| HDL        | 0                            | -0.0265                    | 0.172  | 0.414  | -0.0095                    | 0.0606 | 0.246  | 0.0185                     | 0.0294 | 0.17   | 0.007                      | 0.0153 | 0.123  |
| LDSC       | 0                            | 0.0519                     | 0.3055 | 0.5503 | -0.007                     | 0.1343 | 0.3665 | -0.0014                    | 0.0837 | 0.2894 | 0.0083                     | 0.045  | 0.2119 |
| SCORE      | 0                            | -0.0826                    | 0.102  | 0.308  | -0.0302                    | 0.0428 | 0.205  | 0.0099                     | 0.0145 | 0.12   | 0.0083                     | 0.0084 | 0.0912 |
| GCTA-GREML | 0.2                          | -0.0571                    | 0.123  | 0.346  | -0.0103                    | 0.0328 | 0.181  | 0.0074                     | 0.0152 | 0.123  | -0.0114                    | 0.0077 | 0.0868 |
| GCTA-HE    | 0.2                          | -0.188                     | 0.261  | 0.475  | -0.0234                    | 0.0554 | 0.234  | 0.029                      | 0.0321 | 0.177  | -0.0263                    | 0.0157 | 0.123  |
| HDL        | 0.2                          | -0.094                     | 0.151  | 0.377  | 0.0254                     | 0.0729 | 0.269  | 0.0236                     | 0.0346 | 0.184  | 0.0027                     | 0.0194 | 0.139  |
| LDSC       | 0.2                          | -0.0946                    | 0.2134 | 0.4522 | 0.0134                     | 0.0885 | 0.2973 | 0.0177                     | 0.1088 | 0.3293 | 0.0051                     | 0.0463 | 0.215  |
| SCORE      | 0.2                          | -0.05                      | 0.132  | 0.36   | -0.01                      | 0.033  | 0.181  | 0.0147                     | 0.0159 | 0.125  | -0.0173                    | 0.0089 | 0.0928 |
| GCTA-GREML | 0.5                          | -0.158                     | 0.0858 | 0.247  | -0.012                     | 0.0244 | 0.156  | 0.0159                     | 0.0121 | 0.109  | 0.0092                     | 0.0045 | 0.0662 |
| GCTA-HE    | 0.5                          | -0.142                     | 0.161  | 0.375  | -0.0394                    | 0.0593 | 0.24   | 0.0181                     | 0.0224 | 0.149  | 0.0111                     | 0.0116 | 0.107  |
| HDL        | 0.5                          | -0.162                     | 0.188  | 0.401  | -0.0195                    | 0.0345 | 0.185  | 0.0047                     | 0.0189 | 0.138  | 0.0207                     | 0.009  | 0.0928 |
| LDSC       | 0.5                          | -0.3298                    | 0.278  | 0.4114 | -0.0955                    | 0.1143 | 0.3243 | 0                          | 0.0649 | 0.2547 | 0.0308                     | 0.0312 | 0.1739 |
| SCORE      | 0.5                          | -0.1567                    | 0.0841 | 0.244  | -0.016                     | 0.0266 | 0.1622 | 0.0115                     | 0.0137 | 0.1164 | 0.0143                     | 0.0047 | 0.0669 |
| GCTA-GREML | 0.8                          | -0.317                     | 0.156  | 0.235  | -0.106                     | 0.0283 | 0.131  | -0.0232                    | 0.0073 | 0.082  | -0.0004                    | 0.0033 | 0.0571 |
| GCTA-HE    | 0.8                          | -0.389                     | 0.287  | 0.369  | -0.115                     | 0.0446 | 0.177  | -0.023                     | 0.0139 | 0.116  | 0.0093                     | 0.0061 | 0.0778 |
| HDL        | 0.8                          | -0.391                     | 0.239  | 0.294  | -0.154                     | 0.0518 | 0.168  | -0.0421                    | 0.0141 | 0.111  | -0.0114                    | 0.0057 | 0.0748 |
| LDSC       | 0.8                          | -0.4841                    | 0.3415 | 0.3273 | -0.1851                    | 0.0833 | 0.2215 | -0.0727                    | 0.029  | 0.1541 | -0.019                     | 0.0162 | 0.1257 |
| SCORE      | 0.8                          | -0.319                     | 0.156  | 0.233  | -0.111                     | 0.0309 | 0.137  | -0.0206                    | 0.0067 | 0.0789 | -0.0016                    | 0.0034 | 0.0583 |

Table S3: Bias, mean square error and standard error of genetic correlation estimation methods in simulations corresponding to Figure S1 ( $N = 5,000$  individuals,  $M = 305,630$  SNPs).



| Method     | Genetic correlation $\rho_g$ | $h_1^2 = 0.1, h_2^2 = 0.2$ |        |        | $h_1^2 = 0.2, h_2^2 = 0.6$ |        |        | $h_1^2 = 0.5, h_2^2 = 0.5$ |        |        | $h_1^2 = 0.6, h_2^2 = 0.8$ |        |        |
|------------|------------------------------|----------------------------|--------|--------|----------------------------|--------|--------|----------------------------|--------|--------|----------------------------|--------|--------|
|            |                              | Bias                       | MSE    | SE     | Bias                       | MSE    | SE     | Bias                       | MSE    | SE     | Bias                       | MSE    | SE     |
| GCTA-GREML | 0                            | 0.0414                     | 0.12   | 0.344  | 0.003                      | 0.0343 | 0.185  | -0.0025                    | 0.0157 | 0.125  | -0.0011                    | 0.0075 | 0.0866 |
| GCTA-HE    | 0                            | 0.0964                     | 0.243  | 0.484  | 0.0163                     | 0.0502 | 0.223  | 0.0103                     | 0.0328 | 0.181  | -0.0051                    | 0.0159 | 0.126  |
| HDL        | 0                            | 0.0626                     | 0.193  | 0.434  | -0.0225                    | 0.0699 | 0.263  | 0.0103                     | 0.0292 | 0.171  | 0.0155                     | 0.0171 | 0.13   |
| LDSC       | 0                            | 0.0608                     | 0.2375 | 0.4835 | -0.0273                    | 0.1344 | 0.3656 | 0.0179                     | 0.0862 | 0.2931 | 0.0301                     | 0.0399 | 0.1975 |
| SCORE      | 0                            | 0.0506                     | 0.123  | 0.347  | 0.0023                     | 0.0349 | 0.187  | 0.0022                     | 0.0198 | 0.141  | 0.0052                     | 0.0091 | 0.0952 |
| GCTA-GREML | 0.2                          | -0.0034                    | 0.12   | 0.347  | 0.0143                     | 0.0376 | 0.193  | -0.0055                    | 0.0159 | 0.126  | -0.007                     | 0.0058 | 0.0759 |
| GCTA-HE    | 0.2                          | 0.0162                     | 0.2    | 0.447  | 0.0182                     | 0.0706 | 0.265  | -0.0073                    | 0.0298 | 0.172  | -0.0247                    | 0.0168 | 0.127  |
| HDL        | 0.2                          | -0.0066                    | 0.198  | 0.445  | 0.0155                     | 0.0902 | 0.3    | 0.005                      | 0.0307 | 0.175  | -0.0121                    | 0.0125 | 0.111  |
| LDSC       | 0.2                          | -0.0846                    | 0.2979 | 0.5392 | 0.0209                     | 0.1664 | 0.4073 | -0.0089                    | 0.0744 | 0.2726 | 0.0052                     | 0.033  | 0.1815 |
| SCORE      | 0.2                          | 0.0259                     | 0.0965 | 0.31   | 0.0116                     | 0.0382 | 0.195  | -0.0006                    | 0.0161 | 0.127  | -0.01                      | 0.0065 | 0.0797 |
| GCTA-GREML | 0.5                          | 0.0292                     | 0.102  | 0.319  | 0.0081                     | 0.0289 | 0.17   | 0.0182                     | 0.0121 | 0.108  | 0.0068                     | 0.0075 | 0.0861 |
| GCTA-HE    | 0.5                          | -0.0213                    | 0.146  | 0.382  | 0.0061                     | 0.0576 | 0.24   | 0.0138                     | 0.0226 | 0.15   | 0.0155                     | 0.0155 | 0.123  |
| HDL        | 0.5                          | 0.0137                     | 0.124  | 0.352  | -0.0255                    | 0.0552 | 0.234  | 0.0223                     | 0.0304 | 0.173  | 0.0055                     | 0.0167 | 0.129  |
| LDSC       | 0.5                          | -0.1026                    | 0.2247 | 0.4628 | -0.0634                    | 0.1138 | 0.3313 | -0.0142                    | 0.0766 | 0.2764 | -0.0202                    | 0.0467 | 0.2151 |
| SCORE      | 0.5                          | 0.0317                     | 0.0974 | 0.31   | 0.0039                     | 0.0287 | 0.169  | 0.0197                     | 0.0118 | 0.107  | 0.0076                     | 0.0083 | 0.0909 |
| GCTA-GREML | 0.8                          | -0.112                     | 0.12   | 0.328  | 0.0146                     | 0.0301 | 0.173  | 0.0164                     | 0.0134 | 0.115  | 0.036                      | 0.0095 | 0.0904 |
| GCTA-HE    | 0.8                          | -0.0941                    | 0.212  | 0.451  | 0.0307                     | 0.0454 | 0.211  | 0.0151                     | 0.0277 | 0.166  | 0.0288                     | 0.0185 | 0.133  |
| HDL        | 0.8                          | -0.155                     | 0.172  | 0.385  | 0.0355                     | 0.0665 | 0.255  | 0.0362                     | 0.0336 | 0.18   | 0.0453                     | 0.019  | 0.13   |
| LDSC       | 0.8                          | -0.2322                    | 0.3293 | 0.5248 | 0.0022                     | 0.125  | 0.3536 | 0.0144                     | 0.0733 | 0.2704 | 0.0134                     | 0.0542 | 0.2324 |
| SCORE      | 0.8                          | -0.118                     | 0.121  | 0.327  | 0.0116                     | 0.031  | 0.176  | 0.0228                     | 0.013  | 0.112  | 0.031                      | 0.0121 | 0.105  |

Table S4: Bias, mean square error and standard error of genetic correlation estimation methods in simulations corresponding to Figure S2 ( $N = 5,000$  individuals,  $M = 305,630$  SNPs).

| Method     | Genetic correlation $\rho_g$ | Bias                       | MSE    | SE     | Bias                       | MSE    | SE     | Bias                       | MSE    | SE     | Bias                       | MSE    | SE     |
|------------|------------------------------|----------------------------|--------|--------|----------------------------|--------|--------|----------------------------|--------|--------|----------------------------|--------|--------|
|            |                              | $h_1^2 = 0.1, h_2^2 = 0.2$ |        |        | $h_1^2 = 0.2, h_2^2 = 0.6$ |        |        | $h_1^2 = 0.5, h_2^2 = 0.5$ |        |        | $h_1^2 = 0.6, h_2^2 = 0.8$ |        |        |
| GCTA-GREML | 0                            | 0.0396                     | 0.1156 | 0.3377 | 0.0188                     | 0.0339 | 0.183  | -0.0248                    | 0.0153 | 0.1213 | -0.0084                    | 0.0084 | 0.0912 |
| GCTA-HE    | 0                            | -0.0011                    | 0.1867 | 0.4321 | 0.0314                     | 0.0715 | 0.2656 | -0.02                      | 0.028  | 0.1662 | -0.0041                    | 0.0138 | 0.1174 |
| HDL        | 0                            | 0.0286                     | 0.1395 | 0.3724 | 0.0212                     | 0.0635 | 0.2511 | -0.007                     | 0.0245 | 0.1565 | -0.0058                    | 0.0132 | 0.1145 |
| LDSC       | 0                            | -0.0844                    | 0.1544 | 0.3838 | 0.0206                     | 0.1595 | 0.3989 | 0.0035                     | 0.1012 | 0.3181 | 0.0082                     | 0.0471 | 0.2168 |
| SCORE      | 0                            | 0.0694                     | 0.136  | 0.3623 | 0.0115                     | 0.0452 | 0.2123 | -0.0223                    | 0.0158 | 0.1236 | -0.0091                    | 0.0101 | 0.0999 |
| GCTA-GREML | 0.2                          | -0.0198                    | 0.0722 | 0.268  | 0.0296                     | 0.031  | 0.1736 | 0.014                      | 0.0167 | 0.1285 | 0.0115                     | 0.0089 | 0.0936 |
| GCTA-HE    | 0.2                          | 0.0051                     | 0.1576 | 0.3969 | 0.0224                     | 0.0701 | 0.2639 | 0.012                      | 0.0273 | 0.1647 | 0.0315                     | 0.0165 | 0.1245 |
| HDL        | 0.2                          | 0.0812                     | 0.1502 | 0.379  | 0.0744                     | 0.0527 | 0.2173 | 0.0054                     | 0.031  | 0.1761 | 0.0143                     | 0.0171 | 0.1302 |
| LDSC       | 0.2                          | 0.0072                     | 0.2668 | 0.5165 | 0.0589                     | 0.105  | 0.3187 | -0.0129                    | 0.0719 | 0.2678 | 0.0119                     | 0.0506 | 0.2246 |
| SCORE      | 0.2                          | 0.0135                     | 0.0594 | 0.2433 | 0.0366                     | 0.0424 | 0.2025 | 0.018                      | 0.0188 | 0.136  | 0.0193                     | 0.0105 | 0.1004 |
| GCTA-GREML | 0.5                          | 0.0353                     | 0.1053 | 0.3226 | 0.0472                     | 0.0206 | 0.1356 | 0.0893                     | 0.0206 | 0.1122 | 0.0379                     | 0.0102 | 0.0936 |
| GCTA-HE    | 0.5                          | 0.0019                     | 0.1984 | 0.4454 | 0.0411                     | 0.0584 | 0.2382 | 0.1056                     | 0.0352 | 0.1552 | 0.0527                     | 0.021  | 0.1352 |
| HDL        | 0.5                          | 0.0171                     | 0.1102 | 0.3315 | 0.0397                     | 0.0537 | 0.2284 | 0.1039                     | 0.0327 | 0.1481 | 0.0362                     | 0.0195 | 0.1348 |
| LDSC       | 0.5                          | 0.1266                     | 0.1518 | 0.3684 | 0.0636                     | 0.1265 | 0.3499 | 0.0994                     | 0.0952 | 0.2921 | 0.0514                     | 0.0423 | 0.1992 |
| SCORE      | 0.5                          | 0.0463                     | 0.0992 | 0.3116 | 0.0478                     | 0.0261 | 0.1544 | 0.0882                     | 0.0215 | 0.1171 | 0.0334                     | 0.0121 | 0.1048 |
| GCTA-GREML | 0.8                          | 0.0725                     | 0.1016 | 0.3103 | 0.0939                     | 0.0411 | 0.1796 | 0.0814                     | 0.0235 | 0.1297 | 0.0876                     | 0.0156 | 0.0888 |
| GCTA-HE    | 0.8                          | -0.0097                    | 0.1859 | 0.431  | 0.0844                     | 0.0649 | 0.2405 | 0.0806                     | 0.0393 | 0.1811 | 0.0765                     | 0.0189 | 0.1144 |
| HDL        | 0.8                          | 0.1205                     | 0.144  | 0.3598 | 0.0922                     | 0.0625 | 0.2324 | 0.0993                     | 0.0447 | 0.1867 | 0.0888                     | 0.0262 | 0.1353 |
| LDSC       | 0.8                          | 0.0414                     | 0.1724 | 0.4132 | 0.1331                     | 0.1256 | 0.3284 | 0.0853                     | 0.1186 | 0.3337 | 0.0741                     | 0.0614 | 0.2365 |
| SCORE      | 0.8                          | 0.0363                     | 0.083  | 0.2857 | 0.0953                     | 0.042  | 0.1815 | 0.0839                     | 0.0253 | 0.1353 | 0.0869                     | 0.0175 | 0.0998 |

Table S5: Bias, mean square error and standard error of genetic correlation estimation methods in simulations corresponding to Fig S3 ( $N = 5,000$  individuals,  $M = 305, 630$  SNPs).

| Method     | Overlap Proportion | Bias    | MSE    | SE     |
|------------|--------------------|---------|--------|--------|
| LDSC       | 0                  | -0.1672 | 0.1405 | 0.3355 |
|            | 0.2                | 0.0044  | 0.0921 | 0.3035 |
|            | 0.5                | 0.1708  | 0.1022 | 0.2702 |
|            | 0.8                | 0.0808  | 0.0815 | 0.2737 |
|            | 1                  | -0.0955 | 0.1143 | 0.3243 |
| SCORE      | 0                  | -0.0037 | 0.0405 | 0.2013 |
|            | 0.2                | 0.2242  | 0.0753 | 0.1582 |
|            | 0.5                | 0.2843  | 0.0916 | 0.1036 |
|            | 0.8                | 0.2722  | 0.087  | 0.1428 |
|            | 1                  | -0.016  | 0.0266 | 0.1622 |
| GCTA-GREML | 0                  | -0.0063 | 0.0383 | 0.1956 |
|            | 0.2                | 0.2635  | 0.0957 | 0.1619 |
|            | 0.5                | 0.3301  | 0.1219 | 0.1137 |
|            | 0.8                | 0.2371  | 0.0788 | 0.1505 |
|            | 1                  | -0.012  | 0.0244 | 0.1558 |

Table S6: **Accuracy of SCORE, LDSC, and GCTA-GREML as a function of varying sample overlap corresponding to Figure S4.** See section on Simulations to assess impact of sample overlap in Materials and Methods for details.

| Polygenicity        | $(h_1^2, h_2^2)$ | $\rho_g$ | $\hat{SE}$ | SE   |
|---------------------|------------------|----------|------------|------|
| Polygenicity        | 0.1, 0.2         | 0        | 0.45       | 0.42 |
|                     | 0.2, 0.6         | 0        | 0.2        | 0.2  |
|                     | 0.5, 0.5         | 0        | 0.12       | 0.12 |
|                     | 0.6, 0.8         | 0        | 0.09       | 0.09 |
| Infinitesimal       | 0.1, 0.2         | 0.2      | 0.4        | 0.38 |
|                     | 0.2, 0.6         | 0.2      | 0.19       | 0.19 |
|                     | 0.5, 0.5         | 0.2      | 0.12       | 0.12 |
|                     | 0.6, 0.8         | 0.2      | 0.09       | 0.09 |
|                     | 0.1, 0.2         | 0.5      | 0.41       | 0.3  |
|                     | 0.2, 0.6         | 0.5      | 0.18       | 0.17 |
|                     | 0.5, 0.5         | 0.5      | 0.11       | 0.11 |
|                     | 0.6, 0.8         | 0.5      | 0.07       | 0.07 |
|                     | 0.1, 0.2         | 0.8      | 0.41       | 0.34 |
|                     | 0.2, 0.6         | 0.8      | 0.18       | 0.15 |
|                     | 0.5, 0.5         | 0.8      | 0.09       | 0.09 |
|                     | 0.6, 0.8         | 0.8      | 0.05       | 0.05 |
| Medium polygenicity | 0.1, 0.2         | 0        | 0.45       | 0.39 |
|                     | 0.2, 0.6         | 0        | 0.19       | 0.19 |
|                     | 0.5, 0.5         | 0        | 0.12       | 0.14 |
|                     | 0.6, 0.8         | 0        | 0.09       | 0.09 |
|                     | 0.1, 0.2         | 0.2      | 0.43       | 0.39 |
|                     | 0.2, 0.6         | 0.2      | 0.18       | 0.19 |
|                     | 0.5, 0.5         | 0.2      | 0.12       | 0.12 |
|                     | 0.6, 0.8         | 0.2      | 0.09       | 0.08 |
|                     | 0.1, 0.2         | 0.5      | 0.43       | 0.36 |
|                     | 0.2, 0.6         | 0.5      | 0.18       | 0.18 |
|                     | 0.5, 0.5         | 0.5      | 0.12       | 0.11 |
|                     | 0.6, 0.8         | 0.5      | 0.09       | 0.09 |
|                     | 0.1, 0.2         | 0.8      | 0.44       | 0.36 |
|                     | 0.2, 0.6         | 0.8      | 0.20       | 0.18 |
|                     | 0.5, 0.5         | 0.8      | 0.12       | 0.11 |
|                     | 0.6, 0.8         | 0.8      | 0.1        | 0.11 |
| Low polygenicity    | 0.1, 0.2         | 0        | 0.39       | 0.38 |
|                     | 0.2, 0.6         | 0        | 0.21       | 0.2  |
|                     | 0.5, 0.5         | 0        | 0.12       | 0.12 |
|                     | 0.6, 0.8         | 0        | 0.1        | 0.09 |
|                     | 0.1, 0.2         | 0.2      | 0.35       | 0.29 |
|                     | 0.2, 0.6         | 0.2      | 0.19       | 0.2  |
|                     | 0.5, 0.5         | 0.2      | 0.12       | 0.14 |
|                     | 0.6, 0.8         | 0.2      | 0.19       | 0.2  |
|                     | 0.1, 0.2         | 0.5      | 0.42       | 0.33 |
|                     | 0.2, 0.6         | 0.5      | 0.18       | 0.16 |
|                     | 0.5, 0.5         | 0.5      | 0.13       | 0.12 |
|                     | 0.6, 0.8         | 0.5      | 0.09       | 0.1  |
|                     | 0.1, 0.2         | 0.8      | 0.35       | 0.3  |
|                     | 0.2, 0.6         | 0.8      | 0.19       | 0.18 |
|                     | 0.5, 0.5         | 0.8      | 0.12       | 0.12 |
|                     | 0.6, 0.8         | 0.8      | 0.1        | 0.1  |

Table S7: **Assessment of Jackknife estimates of standard error** ( $N = 5,000$  samples and 305,630 SNPs, block size = 4,000 SNPs). We report the average of estimates of standard error across 100 replicates.

| Small-scale simulations |                  |       |
|-------------------------|------------------|-------|
| Polygenicity            | $(h_1^2, h_2^2)$ | FPR   |
| Infinitesimal           | 0.1, 0.2         | 0.014 |
|                         | 0.2, 0.6         | 0.037 |
|                         | 0.5, 0.5         | 0.01  |
|                         | 0.6, 0.8         | 0.07  |
| Medium polygenicity     | 0.1, 0.2         | 0     |
|                         | 0.2, 0.6         | 0.026 |
|                         | 0.5, 0.5         | 0.071 |
|                         | 0.6, 0.8         | 0.02  |
| Low polygenicity        | 0.1, 0.2         | 0.065 |
|                         | 0.2, 0.6         | 0.054 |
|                         | 0.5, 0.5         | 0.05  |
|                         | 0.6, 0.8         | 0.06  |
| Large-scale simulations |                  |       |
| Prevalance              | $(h_1^2, h_2^2)$ | FPR   |
| Continuous              | 0.272, 0.12      | 0.04  |
| 50%                     | 0.272, 0.12      | 0.08  |
| 10%                     | 0.272, 0.12      | 0.07  |
| 1%                      | 0.272, 0.12      | 0.08  |
| 0.5%                    | 0.272, 0.12      | 0.02  |
| 0.01%                   | 0.272, 0.12      | 0     |

Table S8: **The false positive rate of SCORE is controlled.** We evaluated the false positive rate of SCORE in simulations where  $\rho_g$  is zero. We considered small-scale ( $N = 5,000$  individuals and  $M = 305,630$  SNPs) and large-scale simulations ( $N = 291,273$  individuals and  $M = 305,630$  SNPs). We also considered simulations with binary traits with varying prevalence. Standard error estimates were obtained using a Block Jackknife with a block size of 4000 SNPs. For each genetic architecture, we performed 100 replicates and reported the FPR as the rate with which SCORE rejects the null hypothesis of  $\rho_g = 0$ .

| $h_1^2$ | $h_2^2$ | $\rho_g$ | $\rho_e$ | Prevalence       | $\bar{\rho}_g$ | SE    | p-value |
|---------|---------|----------|----------|------------------|----------------|-------|---------|
| 0.272   | 0.12    | 0        | 0        | Continuous trait | 0.001          | 0.018 | 0.53    |
| 0.272   | 0.12    | -0.23    | 0        | Continuous trait | -0.238         | 0.093 | 0.39    |
| 0.272   | 0.12    | -0.23    | 0        | 50%              | -0.238         | 0.097 | 0.41    |
| 0.272   | 0.12    | -0.23    | 0        | 25%              | -0.239         | 0.101 | 0.43    |
| 0.272   | 0.12    | -0.23    | 0        | 10%              | -0.238         | 0.103 | 0.44    |
| 0.272   | 0.12    | -0.23    | 0        | 1%               | -0.234         | 0.124 | 0.75    |
| 0.272   | 0.12    | -0.23    | 0        | 0.5%             | -0.248         | 0.134 | 0.18    |
| 0.272   | 0.12    | -0.23    | 0        | 0.01%            | -0.215         | 0.205 | 0.44    |
| 0.272   | 0.12    | -0.23    | -0.04    | Continuous trait | -0.211         | 0.107 | 0.08    |
| 0.272   | 0.12    | -0.23    | -0.04    | 0.01%            | -0.243         | 0.342 | 0.70    |
| 0.272   | 0.12    | -0.23    | 0.04     | Continuous trait | -0.221         | 0.089 | 0.52    |
| 0.272   | 0.12    | -0.23    | 0.04     | 0.01%            | -0.235         | 0.352 | 0.89    |

Table S9: **Estimates of  $\rho_g$  as a function of the prevalence of binary traits ( $N = 291, 273$  individuals and 305, 630 SNPs).** We report the average of the point estimates of  $\rho_g$ , the SE and p-value of a test of the null hypothesis that the estimates of  $\rho_g$  are unbiased. We compute p-values of a test of no bias from the Z-score defined as  $\frac{\bar{\rho}_g}{SE/10}$ . See section on simulations to assess accuracy for binary traits in Materials and Methods for details.

|                                                      |                          |
|------------------------------------------------------|--------------------------|
| Lipid metabolism traits                              | Triglycerides            |
| Lipid metabolism traits                              | HDL                      |
| Lipid metabolism traits                              | LDL                      |
| Lipid metabolism traits                              | Total Cholesterol        |
| Lipid metabolism traits                              | High Cholesterol         |
| Blood pressure and circulatory traits                | Pulse Rate               |
| Blood pressure and circulatory traits                | Hypertension             |
| Blood pressure and circulatory traits                | High Blood Pressure      |
| Blood pressure and circulatory traits                | Systolic Blood Pressure  |
| Blood pressure and circulatory traits                | Diastolic Blood Pressure |
| Anthropometric traits                                | Waist Circumference      |
| Anthropometric traits                                | Hip Circumference        |
| Anthropometric traits                                | Trunk Fat                |
| Anthropometric traits                                | Body Fat Percentage      |
| Anthropometric traits                                | Weight                   |
| Anthropometric traits                                | BMI                      |
| Anthropometric traits                                | BMI2010                  |
| Anthropometric traits                                | Height                   |
| Psychiatric disorders                                | Depression               |
| Psychiatric disorders                                | Bipolar                  |
| Autoimmune disorders                                 | Ulcerative Colitis       |
| Autoimmune disorders                                 | Rheumatoid Arthritis     |
| Autoimmune disorders                                 | Eczema                   |
| Autoimmune disorders                                 | Crohn's Disease          |
| Autoimmune disorders                                 | Asthma                   |
| Coronary artery disease related traits               | Heart Attack             |
| Coronary artery disease related traits               | Angina                   |
| Environmental factor traits                          | Townsend Index           |
| Environmental factor traits                          | Former/Current Smoker    |
| Environmental factor traits                          | Ever Smoked              |
| Environmental factor traits                          | Alcohol Intake           |
| Socioeconomic and general medical information traits | Sleep Duration           |
| Socioeconomic and general medical information traits | Morning Evening Person   |
| Socioeconomic and general medical information traits | Getting Up Time          |
| Socioeconomic and general medical information traits | Duration Of Walk         |
| Socioeconomic and general medical information traits | Age Menarch              |
| Socioeconomic and general medical information traits | Age Finish Education     |
| Glucose metabolism and diabetes traits               | T2D                      |
| Glucose metabolism and diabetes traits               | T1D                      |
| Glucose metabolism and diabetes traits               | HbA1C                    |

Table S10: **Forty traits in the UK Biobank analyzed in this study**

## Supplemental Methods

### SCORE-OVERLAP: Estimating genetic correlation when both traits are measured on the same set of individuals

Here we describe our model in the setting where the two traits are measured on the same set of individuals. Let  $\mathbf{X}$  denote the genotype matrix for which both traits are observed. Denote the concatenated phenotype vector,  $\mathbf{y} \equiv [\mathbf{y}_1^T, \mathbf{y}_2^T]^T$ , concatenated environmental effect vector  $\boldsymbol{\epsilon} \equiv [\boldsymbol{\epsilon}_1^T, \boldsymbol{\epsilon}_2^T]^T$ , and concatenated effect size vector  $\boldsymbol{\beta} \equiv [\boldsymbol{\beta}_1^T, \boldsymbol{\beta}_2^T]^T$ . In this setting, the modified generative model is:

$$\mathbf{y} = \begin{bmatrix} \mathbf{X} & 0 \\ 0 & \mathbf{X} \end{bmatrix} \boldsymbol{\beta} + \boldsymbol{\epsilon} \quad (1)$$

In this model, the population covariance of the concatenated phenotype vector  $\mathbf{y}$  is given by:

$$\text{cov}(\mathbf{y}) = \mathbb{E}[\mathbf{y}\mathbf{y}^T] - \mathbb{E}[\mathbf{y}]\mathbb{E}[\mathbf{y}]^T = \begin{bmatrix} \sigma_{g1}^2 \mathbf{K} & \gamma_g \mathbf{K} \\ \gamma_g \mathbf{K}^T & \sigma_{g2}^2 \mathbf{K} \end{bmatrix} + \begin{bmatrix} \sigma_{e1}^2 \mathbf{I}_N & \gamma_e \mathbf{I}_N \\ \gamma_e \mathbf{I}_N & \sigma_{e2}^2 \mathbf{I}_N \end{bmatrix} \quad (2)$$

Here  $\mathbf{K} = \frac{\mathbf{X}\mathbf{X}^T}{M}$  is the genetic relatedness matrix (GRM).  $\sigma_{gt}^2, \sigma_{et}^2$  denote the genetic and environmental variance components associated with trait  $t$ . Our approach to estimate both the variance components and the genetic correlation relies on a Method-of-Moments (MoM) estimator obtained by equating the population covariance to the empirical covariance. The empirical covariance of the concatenated phenotype vector  $\mathbf{y}$  is estimated by the sample covariance:  $\mathbf{y}\mathbf{y}^T$ . The MoM estimator is obtained by solving the following ordinary least squares problem:

$$(\widehat{\gamma}_g, \widehat{\gamma}_e, \widehat{\sigma}_{g1}^2, \widehat{\sigma}_{g2}^2, \widehat{\sigma}_{e1}^2, \widehat{\sigma}_{e2}^2) = \underset{\gamma_g, \gamma_e, \sigma_{g1}^2, \sigma_{g2}^2, \sigma_{e1}^2, \sigma_{e2}^2}{\text{argmin}} \|\mathbf{y}\mathbf{y}^T - \left( \begin{bmatrix} \sigma_{g1}^2 \mathbf{K} & \gamma_g \mathbf{K} \\ \gamma_g \mathbf{K}^T & \sigma_{g2}^2 \mathbf{K} \end{bmatrix} + \begin{bmatrix} \sigma_{e1}^2 \mathbf{I}_N & \gamma_e \mathbf{I}_N \\ \gamma_e \mathbf{I}_N & \sigma_{e2}^2 \mathbf{I}_N \end{bmatrix} \right)\|_F^2 \quad (3)$$

Setting the gradient of the objective function to zero gives us the normal equations. We observe that solving for the genetic and environmental covariance parameters  $(\gamma_g, \gamma_e)$  is decoupled from solving for the variance component parameters:  $\sigma_{g1}^2, \sigma_{e1}^2, \sigma_{g2}^2, \sigma_{e2}^2$ . Thus, MoM estimates of the



covariance parameters can be obtained by solving the set of normal equations:

$$\begin{bmatrix} \text{tr}(\mathbf{K}^2) & \text{tr}(\mathbf{K}) \\ \text{tr}(\mathbf{K}) & N \end{bmatrix} \begin{bmatrix} \widehat{\gamma}_g \\ \widehat{\gamma}_e \end{bmatrix} = \begin{bmatrix} \mathbf{y}_2^T \mathbf{K} \mathbf{y}_1 \\ \mathbf{y}_2^T \mathbf{y}_1 \end{bmatrix} \quad (4)$$

The GRM  $\mathbf{K}$  can be computed in time  $\mathcal{O}(MN^2)$  and  $\mathcal{O}(N^2)$  memory. Given the GRM, computing the coefficients for the normal equations requires  $\mathcal{O}(N^2)$  time. Given each of the coefficients, we can solve analytically for  $\widehat{\gamma}_g$ , and  $\widehat{\gamma}_e$ :

$$\widehat{\gamma}_g = \frac{\mathbf{y}_1^T \mathbf{K} \mathbf{y}_2 - \mathbf{y}_1^T \mathbf{y}_2}{\text{tr}[\mathbf{K}^2] - N}$$

Here we have used the property that  $\text{tr}(\mathbf{K}) = N$  due to the use of a standardized genotype matrix.

Similarly, we can solve the following linear systems for the estimators of each of the genetic variance parameters:

$$\begin{bmatrix} \text{tr}(\mathbf{K}^2) & \text{tr}(\mathbf{K}) \\ \text{tr}(\mathbf{K}) & N \end{bmatrix} \begin{bmatrix} \widehat{\sigma}_{g1}^2 & \widehat{\sigma}_{g2}^2 \\ \widehat{\sigma}_{e1}^2 & \widehat{\sigma}_{e2}^2 \end{bmatrix} = \begin{bmatrix} \mathbf{y}_1^T \mathbf{K} \mathbf{y}_1 & \mathbf{y}_2^T \mathbf{K} \mathbf{y}_2 \\ \mathbf{y}_1^T \mathbf{y}_1 & \mathbf{y}_2^T \mathbf{y}_2 \end{bmatrix} \quad (5)$$

The estimators for  $\sigma_{g1}^2$  and  $\sigma_{g2}^2$  are given by  $\widehat{\sigma}_{g1}^2 = \frac{\mathbf{y}_1^T \mathbf{K} \mathbf{y}_1 - \mathbf{y}_1^T \mathbf{y}_1}{\text{tr}[\mathbf{K}^2] - N}$  and  $\widehat{\sigma}_{g2}^2 = \frac{\mathbf{y}_2^T \mathbf{K} \mathbf{y}_2 - \mathbf{y}_2^T \mathbf{y}_2}{\text{tr}[\mathbf{K}^2] - N}$

Finally, we use estimates of the genetic variance parameters to obtain a plug-in estimate of the genetic correlation:  $\widehat{\rho}_g = \frac{\widehat{\gamma}_g}{\sqrt{\widehat{\sigma}_{g1}^2} \sqrt{\widehat{\sigma}_{g2}^2}}$ .

Substituting the expressions for the genetic covariance and variances and the GRM gives us the following estimator of genetic correlation:

$$\widehat{\rho}_g = \frac{\mathbf{y}_1^T \mathbf{K} \mathbf{y}_2 - \mathbf{y}_1^T \mathbf{y}_2}{\sqrt{\mathbf{y}_1^T \mathbf{K} \mathbf{y}_1 - \mathbf{y}_1^T \mathbf{y}_1} \sqrt{\mathbf{y}_2^T \mathbf{K} \mathbf{y}_2 - \mathbf{y}_2^T \mathbf{y}_2}} \quad (6)$$

Directly computing  $\widehat{\rho}_g$  requires only computing  $\mathbf{X}^T \mathbf{y}_1$ ,  $\mathbf{X}^T \mathbf{y}_2$  and does not require computation of the GRM. Using the fact that the genotype matrix only contains entries in  $\{0, 1, 2, \}$ , we can compute these quantities in time  $\mathcal{O}(\frac{NM}{\max(\log_3 N, \log_3 M)})$  [2]. Thus, when phenotypes are measured on the same set of samples, SCORE-OVERLAP can efficiently estimate  $\rho_g$  with no randomization.

## Modeling fixed-effect covariates

Let  $\mathbf{W}_1$  and  $\mathbf{W}_2$  denote the corresponding covariate matrices for each trait. To include covariate, the generative model in Equation 1 is modified to:

$$\begin{aligned}\mathbf{y}_1 &= \mathbf{W}_1\boldsymbol{\alpha}_1 + \mathbf{X}_1\boldsymbol{\beta}_1 + \boldsymbol{\epsilon}_1 \\ \mathbf{y}_2 &= \mathbf{W}_2\boldsymbol{\alpha}_2 + \mathbf{X}_2\boldsymbol{\beta}_2 + \boldsymbol{\epsilon}_2\end{aligned}\tag{7}$$

Here  $\mathbf{W}_1$  is a  $N_1 \times C_1$  matrix of covariates while  $\boldsymbol{\alpha}_1$  denotes the fixed effect effect. Similarly,  $\mathbf{W}_2$  is a  $N_1 \times C_2$  matrix of covariates while  $\boldsymbol{\alpha}_2$  is a fix effect effect of  $C_2$ -vector. We multiply each of the equations in Equation 7 by the projection matrices  $\mathbf{V}_1 = \mathbf{I}_{N_1} - \mathbf{W}_1(\mathbf{W}_1^T\mathbf{W}_1)^{-1}\mathbf{W}_1^T$  and  $\mathbf{V}_2 = \mathbf{I}_{N_2} - \mathbf{W}_2(\mathbf{W}_2^T\mathbf{W}_2)^{-1}\mathbf{W}_2^T$ :

$$\begin{aligned}\mathbf{V}_1\mathbf{y}_1 &= \mathbf{V}_1\mathbf{X}_1\boldsymbol{\beta}_1 + \mathbf{V}_1\boldsymbol{\epsilon}_1 \\ \mathbf{V}_2\mathbf{y}_2 &= \mathbf{V}_2\mathbf{X}_2\boldsymbol{\beta}_2 + \mathbf{V}_2\boldsymbol{\epsilon}_2\end{aligned}\tag{8}$$

Similar to Equation 5, the MoM estimator is obtained by minimizing the sum of squared differences between the population and empirical covariance as :

$$\begin{aligned}(\hat{\gamma}_g, \hat{\gamma}_e, \hat{\sigma}_{g1}^2, \hat{\sigma}_{g2}^2, \hat{\sigma}_{e1}^2, \hat{\sigma}_{e2}^2) &= \\ \operatorname{argmin}_{\gamma_g, \gamma_e, \sigma_{g1}^2, \sigma_{g2}^2, \sigma_{e1}^2, \sigma_{e2}^2} &\|\tilde{\mathbf{y}}\tilde{\mathbf{y}}^T - \begin{bmatrix} \sigma_{g1}^2\widetilde{\mathbf{K}}_1 & \gamma_g\widetilde{\mathbf{K}}_A \\ \gamma_g\widetilde{\mathbf{K}}_A^T & \sigma_{g2}^2\widetilde{\mathbf{K}}_2 \end{bmatrix} + \begin{bmatrix} \sigma_{e1}^2\mathbf{V}_1 & \gamma_e\mathbf{V}_1\mathbf{C}\mathbf{V}_2 \\ \gamma_e\mathbf{V}_2\mathbf{C}^T\mathbf{V}_1 & \sigma_{e2}^2\mathbf{V}_2 \end{bmatrix}\|_F^2\end{aligned}$$

where  $\tilde{\mathbf{y}} = \begin{bmatrix} \mathbf{V}_1\mathbf{y}_1 \\ \mathbf{V}_2\mathbf{y}_2 \end{bmatrix}$ ,  $\widetilde{\mathbf{K}}_1 = \frac{\mathbf{V}_1\mathbf{X}_1\mathbf{X}_1^T\mathbf{V}_1}{M}$  and  $\widetilde{\mathbf{K}}_2 = \frac{\mathbf{V}_2\mathbf{X}_2\mathbf{X}_2^T\mathbf{V}_2}{M}$ ,  $\widetilde{\mathbf{K}}_A = \frac{\mathbf{V}_1\mathbf{X}_1\mathbf{X}_2^T\mathbf{V}_2}{M}$ , and  $\widetilde{\mathbf{K}}_C = \frac{\mathbf{V}_1\mathbf{X}_1\mathbf{X}_2^T\mathbf{V}_2\mathbf{C}^T}{M}$ .

Thus the MoM estimator for genetic covariance satisfies the normal equations:

$$\begin{bmatrix} \operatorname{tr}(\widetilde{\mathbf{K}}_A\widetilde{\mathbf{K}}_A^T) & \operatorname{tr}(\widetilde{\mathbf{K}}_C) \\ \operatorname{tr}(\widetilde{\mathbf{K}}_C) & N \end{bmatrix} \begin{bmatrix} \hat{\gamma}_g \\ \hat{\gamma}_e \end{bmatrix} = \begin{bmatrix} \mathbf{y}_1^T\widetilde{\mathbf{K}}_A\mathbf{y}_2 \\ \mathbf{y}_1^T\mathbf{V}_1\mathbf{C}\mathbf{V}_2\mathbf{y}_2 \end{bmatrix}\tag{9}$$

SCORE replaces  $\operatorname{tr}(\widetilde{\mathbf{K}}_A\widetilde{\mathbf{K}}_A^T)$  with an unbiased randomized estimate  $\widetilde{L}_B$  using  $B$  random vec-

tors,  $\mathbf{z}_1, \dots, \mathbf{z}_B, z_b \in \mathbb{R}^{N_2}, b \in 1 \dots B$  drawn independently from a distribution with zero mean and identity covariance matrix  $\mathbf{I}_{N_2}$ . The estimator of  $tr(\widetilde{\mathbf{K}}_A \widetilde{\mathbf{K}}_A^T)$  is given by:

$$\widetilde{L}_B = \frac{1}{B} \frac{1}{M^2} \sum_b \|\mathbf{V}_1 \mathbf{X}_1 \mathbf{X}_2^T \mathbf{V}_2 z_b\|_2^2$$

The SCORE estimator is thus obtained by solving Equation 9 by replacing  $tr(\widetilde{\mathbf{K}}_A \widetilde{\mathbf{K}}_A^T)$  with  $\widetilde{L}_B$ .  $\widetilde{L}_B$  is an unbiased estimator for  $tr(\widetilde{\mathbf{K}}_A \widetilde{\mathbf{K}}_A^T)$  since

$$\begin{aligned} \mathbb{E}[\widetilde{L}_B] &= \frac{1}{B} \frac{1}{M^2} \sum_b \mathbb{E}[z_b^T (\mathbf{V}_1 \mathbf{X}_1 \mathbf{X}_2^T \mathbf{V}_2)^T \mathbf{V}_1 \mathbf{X}_1 \mathbf{X}_2^T \mathbf{V}_2 z_b] \\ &= \frac{1}{B} \sum_b \mathbb{E}[z_b^T \widetilde{\mathbf{K}}_A^T \widetilde{\mathbf{K}}_A z_b] \\ &= \frac{1}{B} \sum_b \mathbb{E}[tr(z_b^T \widetilde{\mathbf{K}}_A^T \widetilde{\mathbf{K}}_A z_b)] \\ &= \frac{1}{B} \sum_b \mathbb{E}[tr(z_b z_b^T \widetilde{\mathbf{K}}_A^T \widetilde{\mathbf{K}}_A)] \\ &= \frac{1}{B} \sum_b tr(\mathbb{E}[z_b z_b^T] \widetilde{\mathbf{K}}_A^T \widetilde{\mathbf{K}}_A) \\ &= \frac{1}{B} \sum_b tr(\mathbb{E}[z_b z_b^T] \widetilde{\mathbf{K}}_A^T \widetilde{\mathbf{K}}_A) \\ &= \frac{1}{B} \sum_b tr(\mathbf{I}_{N_2} \widetilde{\mathbf{K}}_A^T \widetilde{\mathbf{K}}_A) \\ &= tr(\widetilde{\mathbf{K}}_A^T \widetilde{\mathbf{K}}_A) \end{aligned}$$

The projection matrix  $\mathbf{V}_1, \mathbf{V}_2$  need not be computed explicitly. While computing  $\mathbf{X}_2^T \mathbf{V}_2 z_b$ , we only need to compute the residual of  $\mathbf{W}_1 (\mathbf{W}_1^T \mathbf{W}_1)^{-1} \mathbf{W}_1^T z_b$ , where the additional computation has the complexity of  $\mathcal{O}(N_1 C_1)$  where  $C_1$  is the number of covariates, which usually is a relatively small number.

### Jackknife Standard Error

In order to compute the standard error using block Jackknife [1], we partition the standardized  $N \times M$  genotype matrix  $\mathbf{X}$  into  $J$  non-overlapping blocks,  $\mathbf{X}^{(1)}, \mathbf{X}^{(2)}, \dots, \mathbf{X}^{(J)}$  where  $\mathbf{X}^{(j)} \in \{1, \dots, J\}$  is an  $N \times \frac{M}{J}$  matrix.

We define  $\widehat{\rho}_{g(j)}$  to be the estimator of genetic correlation computed after excluding genotype block  $\mathbf{X}^{(j)}$  from  $\mathbf{X}$ . Also, we define  $\overline{\rho_{g(j)}} \equiv \frac{1}{J} \sum_j \widehat{\rho}_{g(j)}$

Thus, the jackknife estimate of the standard error is given as

$$\widehat{SE}(\widehat{\rho}_g) = \left[ \frac{J-1}{J} \sum_{j=1}^J (\widehat{\rho}_{g(j)} - \overline{\rho_{g(j)}})^2 \right]^{\frac{1}{2}} \quad (10)$$

The computation of all of the  $\widehat{\rho}_{g(j)}$  can be done with no additional computational cost relative to  $\widehat{\rho}_g$ .

## References

1. Kunsch, H. R. (1989). The jackknife and the bootstrap for general stationary observations. *The Annals of Statistics*, **17**(3), 1217–1241.
2. Liberty, E. and Zucker, S. W. (2009). The mailman algorithm: A note on matrix–vector multiplication. *Information Processing Letters*, **109**(3), 179–182.
